# Supplementary material for: Terpenoids from Myrrh and Their Cytotoxic Activity against HeLa Cells
Source: MDPI journal article supplement (doi:10.3390/molecules28041637), 2023-02-08
Supplement: s1 [file s1]

## Supplementary material

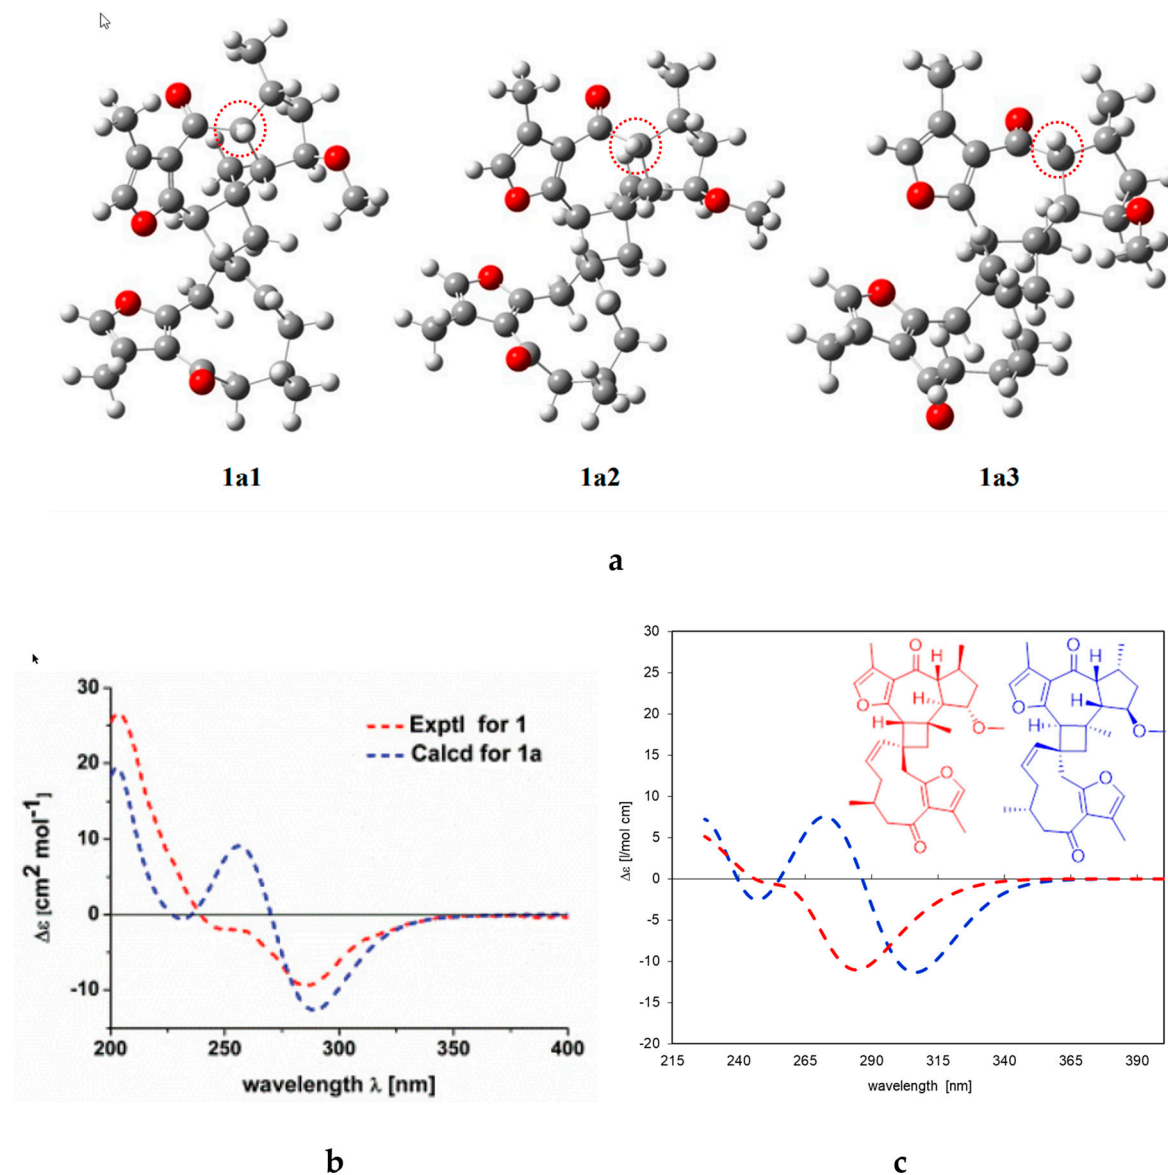

**Figure S1.** (a) Molecular structures of three conformers of commiphorine A underlying the ECD simulations published by previous authors [20]. All structures represent a compound with 1,5-*cis* ring fusion in the guaiane part (H-1 and H-5 are *cis* oriented; the latter is marked by a dashed circle). This arrangement does not correspond to the structure of commiphorine A with a 1,5-*trans*-guaiane moiety postulated in the same work [20]. (b) Experimental ECD spectrum of commiphorine A (red curve) and simulated ECD spectrum (blue curve) obtained with the structures shown in a according to [20]. (c) ECD spectrum simulated for commiphorine A with the erroneous 1,5-*cis* structure (blue curve) and with the correct 1,5-*trans* structure (red curve).

**Table S1.**  $^1\text{H}$  and  $^{13}\text{C}$  NMR data (400 and 100 MHz, respectively) for compounds **9–11** ( $\text{CDCl}_3$ ,  $\delta$  in ppm,  $J$  in Hz, s singlet, d doublet, br broad, m multiplet).

| No. | 9                         |                     | 10                              |                     | 11                              |                     |
|-----|---------------------------|---------------------|---------------------------------|---------------------|---------------------------------|---------------------|
|     | $\delta_{\text{H}}$       | $\delta_{\text{C}}$ | $\delta_{\text{H}}$             | $\delta_{\text{C}}$ | $\delta_{\text{H}}$             | $\delta_{\text{C}}$ |
| 1   | 4.85 (1H, brd, 13.7)      | 130.7               | 5.05 (1H, d, 9.7)               | 128.7               | 4.95 (1H, d, 9.8)               | 129.8               |
| 2   | 2.09 <sup>1</sup> (1H, m) | 25.6                | 5.53 (1H, ddd, 5.0, 10.5, 10.5) | 71.4                | 5.54 (1H, ddd, 5.0, 10.4, 10.4) | 70.8                |
| 3   | 2.20 <sup>1</sup> (1H, m) | 38.5                | 2.03 (1H, dd, 12.0, 12.0)       | 44.9                | 2.02 (1H, dd, 11.1, 11.1)       | 44.2                |
|     | 1.87 <sup>1</sup> (1H, m) |                     |                                 |                     |                                 |                     |
|     | 2.24 <sup>1</sup> (1H, m) |                     |                                 |                     |                                 |                     |
| 4   |                           | 132.9               |                                 | 133.9               |                                 | 132.4               |
| 5   | 4.33 (1H, brd, 11.0)      | 123.8               | 4.99 (1H, dd, 4.1, 11.1)        | 125.8               | 4.60 (1H, brd, 11.1)            | 127.0               |
| 6   | 2.89 (1H, dd, 11.0, 14.6) | 27.5                | 3.16 (1H, dd, 2.7, 17.9)        | 27.0                | 2.89 (1H, dd, 11.1, 15.0)       | 27.6                |
|     | 3.41 (1H, brd, 14.6)      |                     | 3.35 (1H, dd, 10.3, 18.2)       |                     | 3.42 (1H, brd, 15.1)            |                     |
| 7   |                           | 162.8               |                                 | 161.7               |                                 | 161.9               |
| 8   | 4.96 (1H, dd, 4.3, 11.5)  | 82.8                | 5.11 (1H, dd, 7.4, 7.4)         | 83.1                | 4.93 <sup>1</sup> (1H, m)       | 82.6                |
| 9   | 2.10 <sup>1</sup> (1H, m) | 47.2                | 2.18 (1H, dd, 7.7, 14.1)        | 42.6                | 2.08 (1H, dd, 12.6, 12.6)       | 46.5                |
|     | 3.10 (1H, brd, 13.0)      |                     | 3.06 (1H, dd, 6.4, 14.1)        |                     | 3.09 (1H, dd, 4.3, 12.6)        |                     |
| 10  |                           | 132.4               |                                 | 135.3               |                                 | 134.4               |
| 11  |                           | 126.0               |                                 | 126.1               |                                 | 126.5               |
| 12  |                           | 173.8               |                                 | 173.4               |                                 | 173.5               |
| 13  | 1.87 (3H, s)              | 8.9                 | 1.87 (3H, brs)                  | 9.3                 | 1.87 (3H, brs)                  | 9.0                 |
| 14  | 1.50 (3H, s)              | 16.5                | 1.45 (3H, s)                    | 19.8                | 1.63 (3H, s)                    | 17.4                |
| 15  | 1.62 (3H, s)              | 16.8                | 1.64 (3H, brs)                  | 17.9                | 1.70 (3H, brs)                  | 17.8                |
| 1'  |                           |                     |                                 | 170.6               |                                 | 170.6               |
| 2'  |                           |                     | 2.06 (3H, s)                    | 21.3                | 2.05 (3H, s)                    | 21.2                |

<sup>1</sup> overlapped signal

**Table S2.**  $^1\text{H}$  and  $^{13}\text{C}$  NMR data (600 and 150 MHz, respectively) for compounds **12**, **13** and (400 and 100 MHz, respectively) for **14** ( $\text{CDCl}_3$ ,  $\delta$  in ppm,  $J$  in Hz, s singlet, d doublet, br broad, m multiplet).

| No. | 12                             |                     | 13                        |                     | 14                         |                     |
|-----|--------------------------------|---------------------|---------------------------|---------------------|----------------------------|---------------------|
|     | $\delta_{\text{H}}$            | $\delta_{\text{C}}$ | $\delta_{\text{H}}$       | $\delta_{\text{C}}$ | $\delta_{\text{H}}$        | $\delta_{\text{C}}$ |
| 1   | 5.20 (1H, d, 7.7)              | 134.0               | 5.28 (1H, t, 8.5)         | 123.9               | 5.96 (1H, d, 16.4)         | 131.1               |
| 2   | 4.04 (1H, ddd, 2.7, 7.4, 7.4)  | 75.4                | 2.20 <sup>1</sup> (2H, m) | 26.1                | 5.40 (1H, dd, 9.5, 16.4)   | 133.9               |
| 3   | 1.78 (1H, ddd, 2.9, 8.7, 14.7) | 35.9                | 1.80 <sup>1</sup> (1H, m) | 36.3                | 3.07 (1H, dd, 9.2, 9.2)    | 87.2                |
|     | 1.90 (1H, ddd, 4.3, 7.1, 14.3) |                     | 2.27 <sup>1</sup> (1H, m) |                     |                            |                     |
| 4   | 2.32 (1H, m)                   | 25.3                |                           | 140.8               | 2.61 (1H, m)               | 37.0                |
| 5   | 2.51 (1H, dd, 6.3, 17.3)       | 47.3                | 5.86 (1H, s)              | 129.1               | 2.34 (1H, dd, 11.7, 15.05) | 47.3                |
|     | 2.82 <sup>1</sup> (1H, m)      |                     |                           |                     | 2.49 (1H, dd, 2.04, 15.1)  |                     |
| 6   |                                | 197.9               |                           | 193.5               |                            | 202.8               |
| 7   |                                | 158.8               |                           | 121.4               |                            | 116.7               |
| 8   | 5.35 (1H, m)                   | 81.1                |                           | 161.5               |                            | 150.3               |
| 9   | 2.10 (1H, dd, 4.9, 12.1)       | 45.8                | 3.06 (1H, d, 14.3)        | 32.8                | 3.37 (1H, d, 14.5)         | 32.7                |
|     | 2.82 (1H, dd, 12.1, 12.1)      |                     | 3.59 (1H, d, 14.9)        |                     | 3.75 (1H, d, 14.5)         |                     |
| 10  |                                | 133.7               |                           | 134.1               |                            | 141.4               |
| 11  |                                | 129.8               |                           | 122.9               |                            | 127.5               |
| 12  |                                | 172.8               | 7.08 (1H, brs)            | 138.5               | 6.98 (1H, brs)             | 136.8               |
| 13  | 2.01 (3H, brs)                 | 10.3                | 2.19 (3H, brs)            | 9.5                 | 1.98 (3H, s)               | 8.1                 |
| 14  | 1.74 (3H, s)                   | 17.4                | 1.66 (3H, s)              | 22.7                | 4.90 (1H, brs)             | 114.7               |
|     |                                |                     |                           |                     | 5.19 (1H, brs)             |                     |
| 15  | 1.18 (3H, d, 7.2)              | 22.8                | 1.75 (3H, s)              | 19.2                | 1.15 (3H, d, 6.6)          | 17.9                |
| 1'  | 3.25 (3H, s)                   | 56.0                |                           |                     | 3.23 (3H, s)               | 55.6                |

<sup>1</sup> overlapped signal

**Table S3.**  $^1\text{H}$  and  $^{13}\text{C}$  NMR data (400 and 100 MHz, respectively) for compound **15** and (600 and 150 MHz, respectively) for **16** and **17** ( $\text{CDCl}_3$ ,  $\delta$  in ppm,  $J$  in Hz, s singlet, d doublet, br broad, m multiplet).

| No. | 15                                       |            | 16                                                           |            | 17                                                                                                     |            |
|-----|------------------------------------------|------------|--------------------------------------------------------------|------------|--------------------------------------------------------------------------------------------------------|------------|
|     | $\delta_H$                               | $\delta_C$ | $\delta_H$                                                   | $\delta_C$ | $\delta_H$                                                                                             | $\delta_C$ |
| 1   | 5.23 (1H, d, 9.4)                        | 132.8      | 5.19 (1H, d, 8.8)                                            | 129.6      | 2.91 (1H, brd, 10.5)                                                                                   | 61.4       |
| 2   | 4.13 (1H, m)                             | 73.8       | 4.35 (1H, ddd, 4.0, 8.4, 12.0)                               | 76.4       | 1.46 (1H, ddd, 5.8, 11.6, 14.0)                                                                        | 22.8       |
| 3   | 1.90 <sup>1</sup> (2H, m)                | 37.8       | 1.29 <sup>1</sup> (1H, m)<br>1.94 (1H, ddd, 4.7, 12.9, 12.9) | 39.2       | 2.06 (1H, brdd, 5.8, 14.6)<br>1.28 <sup>1</sup> (1H, ddd, 6.1, 13.2)<br>2.21 (1H, ddd, 2.5, 5.8, 13.7) | 35.7       |
| 4   | 2.38 (1H, m)                             | 30.6       | 2.15 <sup>1</sup> (1H, m)                                    | 31.5       |                                                                                                        | 60.1       |
| 5   | 5.52 (1H, d, 8.4)                        | 78.9       | 5.86 (1H, brs)                                               | 76.2       | 2.65 (1H, dd, 2.2, 11.0)                                                                               | 64.0       |
| 6   |                                          | 195.8      |                                                              | 191.5      | 2.26 (1H dd, 11.0, 13.8)<br>2.86 (1H, brd, 13.8)                                                       | 29.3       |
| 7   |                                          | 121.2      |                                                              | 119.6      |                                                                                                        | 134.3      |
| 8   |                                          | 154.3      |                                                              | 157.0      |                                                                                                        | 207.2      |
| 9   | 3.31 (1H, d, 16.8)<br>3.64 (1H, d, 16.8) | 38.1       | 3.37 (1H, d, 14.9)<br>4.06 (1H, d, 14.9)                     | 34.3       | 2.64 (1H, d, 11.0)<br>3.00 (1H, d, 11.0)                                                               | 54.6       |
| 10  |                                          | 135.2      |                                                              | 134.9      |                                                                                                        | 58.4       |
| 11  |                                          | 123.2      |                                                              | 123.0      |                                                                                                        | 137.8      |
| 12  | 7.03 (1H, s)                             | 138.0      | 7.12 (1H, s)                                                 | 139.0      | 1.86 (3H, s)                                                                                           | 20.8       |
| 13  | 1.92 (3H, s)                             | 8.7        | 2.16 (3H, s)                                                 | 10.4       | 1.79 (3H, s)                                                                                           | 22.9       |
| 14  | 1.95 (3H, s)                             | 18.8       | 1.86 (3H, s)                                                 | 23.8       | 1.44 (3H, s)                                                                                           | 17.4       |
| 15  | 1.08 (3H, d, 7.1)                        | 17.3       | 0.91 (3H, d, 7.2)                                            | 14.1       | 1.14 (3H, s)                                                                                           | 15.6       |
| 1'  | 3.25 (3H, s)                             | 55.8       | 3.34 (3H, s)                                                 | 56.8       |                                                                                                        |            |
| 1'' |                                          | 170.3      |                                                              | 171.1      |                                                                                                        |            |
| 2'' | 2.04 (3H, s)                             | 20.7       | 2.22 (3H, s)                                                 | 20.7       |                                                                                                        |            |

<sup>1</sup> overlapped signal

**Table S4.**  $^1\text{H}$  and  $^{13}\text{C}$  NMR data (600 and 150 MHz, respectively) for compounds **18–20** ( $\text{CDCl}_3$ ,  $\delta$  in ppm,  $J$  in Hz, s singlet, d doublet, t triplet, br broad, m multiplet).

| No. | 18                        |                     | 19                                    |                     | 20                                   |                     |
|-----|---------------------------|---------------------|---------------------------------------|---------------------|--------------------------------------|---------------------|
|     | $\delta_{\text{H}}$       | $\delta_{\text{C}}$ | $\delta_{\text{H}}$                   | $\delta_{\text{C}}$ | $\delta_{\text{H}}$                  | $\delta_{\text{C}}$ |
| 1   | 5.71 (1H, brd, 9.9)       | 135.5               | 5.48 (1H, d, 9.4)                     | 130.8               | 1.32 (1H, ddd, 5.5, 12.9, 12.9)      | 40.9                |
| 2   | 5.62 (1H, dt, 3.4, 9.6)   | 125.0               | 5.93 (1H, dd, 5.0, 9.4)               | 124.5               | 1.58 <sup>1</sup> (1H, m)            |                     |
| 3   | 2.83 (1H, brd, 20.4)      | 34.8                | 5.70 (1H, brd, 5.0)                   | 117.8               | 1.64 <sup>1</sup> (2H, m)            | 22.3                |
|     | 2.97 (1H, brd, 20.4)      |                     |                                       |                     | 1.98 (1H, ddd, 5.5, 12.9, 12.9)      | 36.3                |
| 4   |                           | 144.7               |                                       | 139.5               | 2.38 (1H, dddd, 2.1, 2.1, 4.1, 13.2) |                     |
| 5   | 2.66 <sup>1</sup> (1H, m) | 46.2                | 1.68 <sup>1</sup> (1H, dd, 5.0, 12.1) | 47.6                |                                      | 148.5               |
| 6   | 2.62 <sup>1</sup> (1H, m) | 22.1                | 2.01 (1H, dd, 12.4, 14.0)             | 26.8                | 1.85 <sup>1</sup> (1H, brd, 13.2)    | 50.0                |
|     | 2.79 (1H, dd, 2.8, 16.0)  |                     | 2.79 (1H, dd, 5.0, 13.8)              |                     | 2.30 <sup>1</sup> (1H, m)            | 25.7                |
| 7   |                           | 148.4               |                                       | 160.8               | 2.72 (1H, dd, 3.9, 13.8)             |                     |
| 8   |                           | 148.2               | 4.64 (1H, dd, 5.8, 11.8)              | 78.7                |                                      | 162.5               |
| 9   | 5.76 (1H, s)              | 117.5               | 1.18 (1H, dd, 12.1, 12.1)             | 45.5                | 4.83 (1H, dd, 6.1, 11.6)             | 78.0                |
|     |                           |                     | 2.41 (1H, dd, 6.1, 12.7)              |                     | 1.13 (1H, dd, 11.8, 11.8)            | 47.5                |
| 10  |                           | 39.7                |                                       | 36.4                | 2.30 <sup>1</sup> (1H, m)            |                     |
| 11  |                           | 120.9               |                                       | 119.0               |                                      | 37.0                |
| 12  |                           | 171.2               |                                       | 175.1               |                                      | 120.2               |
| 13  | 1.92 (3H, s)              | 8.5                 | 1.82 (3H, brs)                        | 8.2                 |                                      | 174.8               |
| 14  | 0.99 (3H, s)              | 23.4                | 0.96 (3H, s)                          | 24.8                | 1.82 (3H, brs)                       | 8.2                 |
| 15  | 4.81 (1H, s)              | 108.3               | 1.87 (3H, brs)                        | 22.3                | 0.89 (3H, s)                         | 16.4                |
|     | 5.04 (1H, s)              |                     |                                       |                     | 4.60 (1H, brs)                       | 106.9               |
|     |                           |                     |                                       |                     | 4.87 (1H, brs)                       |                     |

<sup>1</sup> overlapped signal

**Table S5.**  $^1\text{H}$  and  $^{13}\text{C}$  NMR data (600 and 150 MHz, respectively) for compounds **21** and **22** ( $\text{CDCl}_3$ ,  $\delta$  in ppm,  $J$  in Hz, s singlet, d doublet, br broad, m multiplet).

| No. | 21                        |                     | 22                             |                     |
|-----|---------------------------|---------------------|--------------------------------|---------------------|
|     | $\delta_{\text{H}}$       | $\delta_{\text{C}}$ | $\delta_{\text{H}}$            | $\delta_{\text{C}}$ |
| 1   | 5.89 (1H, dd, 11.0, 17.6) | 146.3               | 2.75 <sup>1</sup> (1H, m)      | 50.4                |
| 2   | 5.18 (1H, d, 11.0)        | 113.2               | 4.00 (1H, ddd, 6.2, 6.2, 6.2)  | 82.1                |
|     | 5.21 (1H, d, 17.6)        |                     |                                |                     |
| 3   | 4.68 (1H, brs)            | 113.9               | 1.61 (1H, ddd, 6.5, 6.5, 12.8) | 38.1                |
|     | 4.82 (1H, brs)            |                     | 1.83 <sup>1</sup> (1H, m)      |                     |
| 4   |                           | 147.1               | 2.78 <sup>1</sup> (1H, m)      | 30.1                |
| 5   | 2.58 (1H, dd, 1.7, 7.2)   | 49.4                | 2.26 <sup>1</sup> (1H, m)      | 59.6                |
| 6   | 2.65 (1H, dd, 7.1, 14.9)  | 28.6                |                                | 195.6               |
|     | 2.70 (1H, dd, 1.4, 14.6)  |                     |                                |                     |
| 7   |                           | 161.9               |                                | 120.9               |
| 8   | 4.86 (1H, dd, 6.3, 11.8)  | 78.1                |                                | 158.7               |
| 9   | 1.67 (1H, dd, 12.4, 12.4) | 39.2                | 6.33 (1H, brs)                 | 116.9               |
|     | 2.31 (1H, dd, 6.3, 12.9)  |                     |                                |                     |
| 10  |                           | 40.7                |                                | 147.7               |
| 11  |                           | 120.8               |                                | 122.4               |
| 12  |                           | 174.7               | 7.04 (1H, brs)                 | 138.1               |
| 13  | 1.80 (3H, brs)            | 8.2                 | 2.24 (3H, brs)                 | 10.2                |
| 14  | 1.00 (3H, s)              | 27.9                | 2.14 (3H, brs)                 | 22.1                |
| 15  | 1.71 (3H, brs)            | 25.3                | 1.08 (3H, d, 7.2)              | 22.0                |
| 1'  |                           |                     | 3.30 (3H, s)                   | 56.4                |

<sup>1</sup> overlapped signal

**Table S6.**  $^1\text{H}$  and  $^{13}\text{C}$  NMR data (600 and 150 MHz, respectively) for compound **25** and (400 and 100 MHz, respectively) for **26** and **27** ( $\text{CDCl}_3$ ,  $\delta$  in ppm,  $J$  in Hz, s singlet, d doublet, br broad, m multiplet).

| No. | 25                              |                     | 26                        |                     | 27                              |                     |
|-----|---------------------------------|---------------------|---------------------------|---------------------|---------------------------------|---------------------|
|     | $\delta_{\text{H}}$             | $\delta_{\text{C}}$ | $\delta_{\text{H}}$       | $\delta_{\text{C}}$ | $\delta_{\text{H}}$             | $\delta_{\text{C}}$ |
| 1   | 1.47 <sup>1</sup> (1H, m)       | 39.5                | 0.98 (1H, ddd, 4.4)       | 39.0                | 1.62 <sup>1</sup> (2H, m)       | 34.3                |
|     | 1.94 <sup>1</sup> (1H, m)       |                     | 1.69 <sup>1</sup> (1H, m) |                     |                                 |                     |
| 2   | 2.46 (1H, ddd, 4.4, 7.7, 16.0)  | 34.0                | 1.59 <sup>1</sup> (2H, m) | 27.4                | 2.21 (1H, ddd, 7.3, 10.5, 15.2) | 28.2                |
|     | 2.51 (1H, ddd, 7.4, 9.1, 15.7)  |                     |                           |                     | 2.41 <sup>1</sup> (1H, m)       |                     |
| 3   |                                 | 217.5               | 3.20 (1H, dd, 5.0, 11.2)  | 78.9                |                                 | 179.8               |
| 4   |                                 | 47.4                |                           | 39.0                |                                 | 147.5               |
| 5   | 1.40 (1H, dd, 3.0, 11.2)        | 55.2                | 0.76 (1H, dd, 3.2, 11.8)  | 56.0                | 2.00 (1H, dd, 3.8, 11.9)        | 51.0                |
| 6   | 1.55 <sup>1</sup> (2H, m)       | 19.6                | 1.51 <sup>1</sup> (2H, m) | 18.3                | 1.39 <sup>1</sup> (1H, m)       | 24.7                |
|     |                                 |                     |                           |                     | 1.87 (1H, ddd, 3.3, 12.9, 25.9) |                     |
| 7   | 1.27 (1H, m)                    | 34.7                | 1.29 <sup>1</sup> (1H, m) | 35.5                | 1.25 (1H, ddd, 3.2, 3.2, 12.9)  | 34.1                |
|     | 1.58 (1H, m)                    |                     | 1.57 <sup>1</sup> (1H, m) |                     | 1.62 <sup>1</sup> (1H, m)       |                     |
| 8   |                                 | 39.5                |                           | 39.9                |                                 | 39.6                |
| 9   | 1.56 <sup>1</sup> (1H, m)       | 49.8                | 1.46 <sup>1</sup> (1H, m) | 50.9                | 1.64 <sup>1</sup> (1H, m)       | 41.4                |
| 10  |                                 | 36.9                |                           | 37.4                |                                 | 39.3                |
| 11  | 1.42 <sup>1</sup> (1H, m)       | 21.8                | 1.27 <sup>1</sup> (1H, m) | 21.9                | 1.34 <sup>1</sup> (1H, m)       | 22.4                |
|     | 1.65 <sup>1</sup> (1H, m)       |                     | 1.59 <sup>1</sup> (1H, m) |                     | 1.49 <sup>1</sup> (1H, m)       |                     |
| 12  | 1.54 <sup>1</sup> (1H, m)       | 26.7                | 1.43 <sup>1</sup> (1H, m) | 23.9                | 1.45 <sup>1</sup> (1H, m)       | 23.8                |
|     | 1.90 <sup>1</sup> (1H, m)       |                     | 1.72 <sup>1</sup> (1H, m) |                     | 1.74 <sup>1</sup> (1H, m)       |                     |
| 13  | 2.06 (1H, ddd, 3.3, 12.1, 12.1) | 41.7                | 2.72 (1H, m)              | 47.7                | 2.72 (1H, m)                    | 47.7                |
| 14  |                                 | 45.5                |                           | 53.0                |                                 | 53.4                |
| 15  | 1.96 (1H, d, 15.4)              | 49.4                | 1.69 <sup>1</sup> (1H, m) | 39.9                | 1.70 <sup>1</sup> (1H, m)       | 40.0                |
|     | 2.20 (1H, d, 16.4)              |                     | 2.35 (1H, brd, 15.9)      |                     | 2.35 <sup>1</sup> (1H, brd)     |                     |
| 16  |                                 | 223.9               | 5.65 (1H, m)              | 130.0               | 5.65 (1H, m)                    | 130.0               |
| 17  | 2.23 (1H, d, 12.1)              | 57.2                | 5.56 (1H, m)              | 134.1               | 5.56 (1H, m)                    | 134.0               |
| 18  | 1.09 (3H, s)                    | 15.6                | 1.01 (3H, s)              | 18.3                | 1.07 (3H, s)                    | 17.9                |
| 19  | 0.97 (3H, s)                    | 15.9                | 0.85 (3H, s)              | 16.1                | 0.87 (3H, s)                    | 20.0                |
| 20  |                                 | 74.4                |                           |                     |                                 |                     |
| 21  | 1.11 (3H, s)                    | 24.9                |                           |                     |                                 |                     |
| 22  | 1.45 <sup>1</sup> (2H, m)       | 41.1                |                           |                     |                                 |                     |
| 23  | 1.96 <sup>1</sup> (1H, m)       | 21.9                |                           |                     |                                 |                     |
|     | 2.15 <sup>1</sup> (1H, m)       |                     |                           |                     |                                 |                     |
| 24  | 5.06 (1H, dd, 6.9, 6.9)         | 124.2               |                           |                     |                                 |                     |
| 25  |                                 | 131.6               |                           |                     |                                 |                     |
| 26  | 1.61 (3H, s)                    | 17.8                |                           |                     |                                 |                     |
| 27  | 1.68 (3H, s)                    | 25.8                |                           |                     |                                 |                     |
| 28  | 0.98 (3H, s)                    | 16.8                | 0.78 (3H, s)              | 15.3                | 4.68 (1H, d, 1.5)               | 113.5               |
| 29  | 1.05 (3H, s)                    | 21.0                | 0.98 (3H, s)              | 28.0                | 4.86 (3H, brs)                  | 23.2                |
| 30  | 1.09 (3H, s)                    | 26.7                | 0.99 (3H, s)              | 17.1                | 1.74 (3H, s)                    | 17.0                |

<sup>1</sup> overlapped signal

**Table S7.**  $^1\text{H}$  and  $^{13}\text{C}$  NMR data (600 and 150 MHz, respectively) for compounds **28**, **29** and (400 and 100 MHz, respectively) for **30** ( $\text{CDCl}_3$ ,  $\delta$  in ppm,  $J$  in Hz, s singlet, d doublet, br broad, m multiplet).

| No. | 28                              |                     | 29                                   |                     | 30                              |                     |
|-----|---------------------------------|---------------------|--------------------------------------|---------------------|---------------------------------|---------------------|
|     | $\delta_{\text{H}}$             | $\delta_{\text{C}}$ | $\delta_{\text{H}}$                  | $\delta_{\text{C}}$ | $\delta_{\text{H}}$             | $\delta_{\text{C}}$ |
| 1   | 3.58 (1H, dd, 2.9)              | 73.7                | 3.54 (1H, d, 3.1)                    | 75.3                | 4.63 (1H, dd, 2.8, 2.8)         | 76.3                |
| 2   | 1.74 (1H, ddd, 2.9, 12.7, 12.7) | 36.6                | 3.63 (1H, brd, 9.8)                  | 72.6                | 1.75 (1H, ddd, 2.8, 12.2, 14.0) | 34.2                |
|     | 1.90 <sup>1</sup> (1H, m)       |                     |                                      |                     | 2.01 (1H, ddd, 3.0, 4.4, 14.0)  |                     |
| 3   | 3.74 (1H, dd, 4.4, 12.1)        | 73.8                | 3.48 (1H, d, 9.0)                    | 78.3                | 3.57 (1H, dd, 4.4, 12.1)        | 74.2                |
| 4   |                                 | 40.5                |                                      | 40.1                |                                 | 40.2                |
| 5   | 1.89 <sup>1</sup> (1H, m)       | 39.5                | 1.92 <sup>1</sup> (1H, m)            | 39.3                | 1.86 <sup>1</sup> (1H, m)       | 40.7                |
| 6   | 0.83 (1H, dd, 2.4, 12.4)        | 20.8                | 0.82 <sup>1</sup> (1H, m)            | 20.3                | 0.87 <sup>1</sup> (1H, m)       | 20.5                |
|     | 1.66 <sup>1</sup> (1H, m)       |                     | 1.63 <sup>1</sup> (1H, m)            |                     | 1.65 <sup>1</sup> (1H, m)       |                     |
| 7   | 1.09 <sup>1</sup> (1H, m)       | 25.7                | 1.14 <sup>1</sup> (1H, m, 2.4, 12.5) | 25.6                | 1.15 <sup>1</sup> (1H, m)       | 25.1                |
|     | 1.33 <sup>1</sup> (1H, m)       |                     | 1.34 <sup>1</sup> (1H, m)            |                     | 1.37 <sup>1</sup> (1H, m)       |                     |
| 8   | 1.49 (1H, dd, 4.5, 12.5)        | 48.0                | 1.52 (1H, dd, 4.6, 12.3)             | 47.9                | 1.58 <sup>1</sup> (1H, m)       | 46.6                |
| 9   |                                 | 20.8                |                                      | 20.6                |                                 | 21.1                |
| 10  |                                 | 30.3                |                                      | 29.1                |                                 | 28.2                |
| 11  | 1.30 <sup>1</sup> (1H, m)       | 26.1                | 1.26 <sup>1</sup> (1H, m)            | 26.2                | 1.21 <sup>1</sup> (1H, m)       | 26.0                |
|     | 2.19 (1H, ddd, 8.5, 8.7, 14.6)  |                     | 2.28 (1H, ddd, 8.6, 8.6, 15.0)       |                     | 1.86 <sup>1</sup> (1H, m)       |                     |
| 12  | 1.67 <sup>1</sup> (2H, m)       | 32.9                | 1.67 <sup>1</sup> (2H, m)            | 32.8                | 1.54 <sup>1</sup> (2H, m)       | 32.7                |
| 13  |                                 | 45.1                |                                      | 45.2                |                                 | 45.1                |
| 14  |                                 | 48.8                |                                      | 48.8                |                                 | 48.8                |
| 15  | 1.29 <sup>1</sup> (2H, m)       | 35.7                | 1.29 <sup>1</sup> (2H, m)            | 35.7                | 1.28 <sup>1</sup> (2H, m)       | 35.5                |
| 16  | 1.29 <sup>1</sup> (1H, m)       | 28.1                | 1.29 <sup>1</sup> (1H, m)            | 28.1                | 1.29 <sup>1</sup> (1H, m)       | 28.0                |
|     | 1.90 <sup>1</sup> (1H, m)       |                     | 1.91 <sup>1</sup> (1H, m)            |                     | 1.90 <sup>1</sup> (1H, m)       |                     |
| 17  | 1.59 <sup>1</sup> (1H, m)       | 52.3                | 1.59 <sup>1</sup> (1H, m)            | 52.3                | 1.57 <sup>1</sup> (1H, m)       | 52.2                |
| 18  | 0.95 <sup>1</sup> (3H, s)       | 18.2                | 0.95 (3H, s)                         | 18.1                | 0.93 (3H, s)                    | 17.8                |
| 19  | 0.46 (1H, d, 4.6)               | 30.0                | 0.48 (1H, d, 4.4)                    | 29.4                | 0.44 (1H, d, 4.4)               | 28.3                |
|     | 0.71 (1H, d, 4.6)               |                     |                                      |                     | 0.74 (1H, d, 4.4)               |                     |
| 20  | 1.38 <sup>1</sup> (1H, m)       | 35.9                | 0.72 (1H, d, 4.4)                    | 35.9                | 1.38 <sup>1</sup> (1H, m)       | 35.9                |
| 21  | 0.88 (3H, d, 6.4)               | 18.2                | 1.38 <sup>1</sup> (1H, m)            | 18.2                | 0.87 (3H, d, 6.6)               | 18.2                |
| 22  | 1.05 <sup>1</sup> (1H, m)       | 36.3                | 0.89 (3H, d, 6.4)                    | 36.3                | 1.04 <sup>1</sup> (1H, m)       | 36.3                |
|     | 1.44 <sup>1</sup> (1H, m)       |                     |                                      |                     | 1.44 <sup>1</sup> (1H, m)       |                     |
| 23  | 1.86 <sup>1</sup> (1H, m)       | 25.0                | 1.04 <sup>1</sup> (1H, m)            | 25.0                | 1.86 <sup>1</sup> (1H, m)       | 24.9                |
|     | 2.04 <sup>1</sup> (1H, m)       |                     | 1.43 <sup>1</sup> (1H, m)            |                     | 2.04 <sup>1</sup> (1H, m)       |                     |
| 24  | 5.10 (1H, dd, 7.0, 7.0)         | 125.2               | 1.86 <sup>1</sup> (1H, m)            | 125.2               | 5.10 (1H, dd, 7.2, 7.2)         | 125.2               |
|     |                                 |                     | 2.04 (1H, m)                         |                     |                                 |                     |
| 25  |                                 | 131.0               | 5.10 (1H, dd, 7.2, 7.2)              | 130.9               |                                 | 130.9               |
| 26  | 1.60 (3H, s)                    | 17.7                |                                      | 17.7                | 1.60 (3H, s)                    | 17.6                |
| 27  | 1.68 (3H, s)                    | 25.8                | 1.60 (3H, s)                         | 25.7                | 1.68 (3H, s)                    | 25.7                |
| 28  | 0.92 (3H, s)                    | 19.5                | 1.69 (3H, s)                         | 19.4                | 0.91 (3H, s)                    | 19.1                |
| 29  | 1.00 (3H, s)                    | 25.2                | 0.95 (3H, s)                         | 25.6                | 1.01 (3H, s)                    | 25.0                |
| 30  | 0.79 (3H, s)                    | 13.0                | 1.00 (3H, s)                         | 14.3                | 0.80 (3H, s)                    | 13.0                |
| 1'  |                                 |                     |                                      |                     |                                 | 170.3               |
| 2'  |                                 |                     |                                      |                     | 2.06 (3H, s)                    | 21.4                |

<sup>1</sup> overlapped signal



**Table S8.**  $^1\text{H}$  and  $^{13}\text{C}$  NMR data (400 and 100 MHz, respectively) for compounds **31** and **32** and (600 and 150 MHz, respectively) for **33** ( $\text{CDCl}_3$ ,  $\delta$  in ppm,  $J$  in Hz, s singlet, d doublet, br broad, m multiplet).

| No. | <b>31</b>                 |                     | <b>32</b>                 |                     | <b>33</b>                 |                     |
|-----|---------------------------|---------------------|---------------------------|---------------------|---------------------------|---------------------|
|     | $\delta_{\text{H}}$       | $\delta_{\text{C}}$ | $\delta_{\text{H}}$       | $\delta_{\text{C}}$ | $\delta_{\text{H}}$       | $\delta_{\text{C}}$ |
| 1   | 4.87 (1H, d, 3.5)         | 77.9                | 3.52 (1H, d, 3.3)         | 75.8                | 3.94 (1H, d, 2.9)         | 74.9                |
| 2   | 3.84 (1H, dd, 3.5, 10.0)  | 71.9                | 3.75 (1H, dd, 3.3, 10.5)  | 71.7                | 3.62 (1H, dd, 2.9, 9.4)   | 73.8                |
| 3   | 3.43 (1H, d, 10.0)        | 77.6                | 4.92 (1H, d, 10.5)        | 80.4                | 3.32 (1H, dd, 9.4, 9.4)   | 77.1                |
| 4   |                           | 39.9                |                           | 40.0                | 1.47 (1H, m)              | 36.5                |
| 5   | 1.89 <sup>1</sup> (1H, m) | 40.6                | 2.04 (1H, dd, 4.7, 12.4)  | 38.9                | 1.50 (1H, m)              | 39.9                |
| 6   | 0.86 <sup>1</sup> (1H, m) | 20.4                | 0.83 <sup>1</sup> (1H, m) | 20.6                | 1.32 (1H, m)              | 20.0                |
|     | 1.63 <sup>1</sup> (1H, m) |                     | 1.63 <sup>1</sup> (1H, m) |                     | 1.79 (1H, m)              |                     |
| 7   | 1.14 <sup>1</sup> (1H, m) | 25.1                | 1.17 <sup>1</sup> (1H, m) | 25.6                | 2.17 (2H, m)              | 21.5                |
|     | 1.37 <sup>1</sup> (1H, m) |                     | 1.35 <sup>1</sup> (1H, m) |                     |                           |                     |
| 8   | 1.59 <sup>1</sup> (1H, m) | 46.7                | 1.52 (1H, dd, 4.4, 12.7)  | 47.9                |                           | 139.0               |
| 9   |                           | 20.8                |                           | 20.3                |                           | 130.0               |
| 10  |                           | 28.0                |                           | 28.8                |                           | 42.3                |
| 11  | 1.22 <sup>1</sup> (1H, m) | 26.4                | 1.25 <sup>1</sup> (1H, m) | 26.1                | 2.06 (2H, m)              | 25.7                |
|     | 1.85 <sup>1</sup> (1H, m) |                     | 2.29 <sup>1</sup> (1H, m) |                     |                           |                     |
| 12  | 1.60 <sup>1</sup> (2H, m) | 32.7                | 1.68 <sup>1</sup> (2H, m) | 32.7                | 1.78 (2H, m)              | 30.9                |
| 13  |                           | 45.1                |                           | 45.2                |                           | 44.6                |
| 14  |                           | 48.9                |                           | 48.8                |                           | 50.2                |
| 15  | 1.28 <sup>1</sup> (2H, m) | 35.5                | 1.31 <sup>1</sup> (2H, m) | 35.7                | 1.19 (1H, m)              | 30.8                |
|     |                           |                     |                           |                     | 1.59 (1H, m)              |                     |
| 16  | 1.29 <sup>1</sup> (1H, m) | 28.0                | 1.30 <sup>1</sup> (1H, m) | 28.1                | 1.32 (1H, m)              | 28.0                |
|     | 1.89 <sup>1</sup> (1H, m) |                     | 1.92 <sup>1</sup> (1H, m) |                     | 1.93 (1H, m)              |                     |
| 17  | 1.57 <sup>1</sup> (1H, m) | 52.2                | 1.61 <sup>1</sup> (1H, m) | 52.3                | 1.51 (1H, m)              | 50.3                |
| 18  | 0.92 (3H, s)              | 17.9                | 0.96 (3H, s)              | 18.1                | 0.72 (3H, s)              | 15.7                |
| 19  | 0.53 (1H, d, 5.0)         | 28.2                | 0.51 (1H, d, 4.4)         | 29.3                | 0.99 (3H, s)              | 18.6                |
|     | 0.81 (1H, d, 5.0)         |                     | 0.72 (1H, d, 4.4)         |                     |                           |                     |
| 20  | 1.36 <sup>1</sup> (1H, m) | 35.9                | 1.39 <sup>1</sup> (1H, m) | 35.9                | 1.39 (1H, m)              | 36.3                |
| 21  | 0.86 (3H, d, 6.6)         | 18.2                | 0.89 <sup>1</sup> (3H, m) | 18.2                | 0.92 (3H, d)              | 18.7                |
| 22  | 1.04 <sup>1</sup> (1H, m) | 36.3                | 1.05 <sup>1</sup> (1H, m) | 36.3                | 1.04 (1H, m)              | 36.3                |
|     | 1.42 <sup>1</sup> (1H, m) |                     | 1.44 <sup>1</sup> (1H, m) |                     | not detected <sup>1</sup> |                     |
| 23  | 1.85 <sup>1</sup> (1H, m) | 25.0                | 1.86 <sup>1</sup> (1H, m) | 24.9                | 1.86 (1H, m)              | 24.9                |
|     | 2.03 <sup>1</sup> (1H, m) |                     | 2.04 <sup>1</sup> (1H, m) |                     | 2.03 (1H, m)              |                     |
| 24  | 5.09 (1H, dd, 7.1, 7.1)   | 125.2               | 5.10 (1H, dd, 7.2, 7.2)   | 125.2               | 5.10 (1H, dd, 7.0, 7.0)   | 125.2               |
| 25  |                           | 131.0               |                           | 130.9               |                           | 131.0               |
| 26  | 1.60 (3H, s)              | 17.6                | 1.60 (3H, s)              | 17.6                | 1.60 (3H, s)              | 17.5                |
| 27  | 1.68 (3H, s)              | 25.7                | 1.69 (3H, s)              | 25.7                | 1.69 (3H, s)              | 25.8                |
| 28  | 0.91 (3H, s)              | 19.0                | 0.96 (3H, s)              | 19.4                | 0.92 (3H, s)              | 25.1                |
| 29  | 1.04 (3H, s)              | 25.6                | 0.88 (3H, s)              | 25.4                | 1.04 (3H, d, 5.9)         | 14.9                |
| 30  | 0.85 (3H, s)              | 14.4                | 0.89 (3H, s)              | 15.4                |                           |                     |
| 1'  | 2.12 (3H, s)              | 172.0               |                           | 175.0               |                           |                     |
| 2'  | 0.85 (3H, s)              | 21.2                | 2.29 (2H, d, 7.2)         | 43.8                |                           |                     |
| 3'  |                           |                     | 2.15 (1H, m)              | 25.7                |                           |                     |
| 4'  |                           |                     | 1.00 (3H, d, 6.8)         | 22.4                |                           |                     |
| 5'  |                           |                     | 1.00 (3H, d, 6.8)         | 22.5                |                           |                     |

<sup>1</sup> overlapped signal.

**Table S9.**  $^1\text{H}$  and  $^{13}\text{C}$  NMR data (600 and 150 MHz, respectively) for compound **34** ( $\text{CDCl}_3$ ,  $\delta$  in ppm,  $J$  in Hz, s singlet, d doublet, br broad, m multiplet).

| No. | <b>34</b>                      |                     |
|-----|--------------------------------|---------------------|
|     | $\delta_{\text{H}}$            | $\delta_{\text{C}}$ |
| 1   | 1.45 <sup>1</sup> (1H, m)      | 39.9                |
|     | 1.92 (1H, ddd, 4.7, 8.0, 12.9) |                     |
| 2   | 2.43 (1H, ddd, 4.5, 8.0, 15.8) | 34.1                |
|     | 2.50 (1H, ddd, 7.7, 9.6, 15.7) |                     |
| 3   |                                | 218.1               |
| 4   |                                | 47.4                |
| 5   | 1.37 <sup>1</sup> (1H, m)      | 55.3                |
| 6   | 1.47 <sup>1</sup> (1H, m)      | 19.6                |
|     | 1.56 <sup>1</sup> (1H, m)      |                     |
| 7   | 1.32 (1H, m)                   | 34.5                |
|     | 1.56 <sup>1</sup> (1H, m)      |                     |
| 8   |                                | 40.3                |
| 9   | 1.42 <sup>1</sup> (1H, m)      | 50.0                |
| 10  |                                | 36.8                |
| 11  | 1.31 <sup>1</sup> (1H, m)      | 22.0                |
|     | 1.50 <sup>1</sup> (1H, m)      |                     |
| 12  | 1.28 <sup>1</sup> (1H, m)      | 27.5                |
|     | 1.85 (1H, m)                   |                     |
| 13  | 1.66 <sup>1</sup> (1H, m)      | 42.4                |
| 14  |                                | 50.3                |
| 15  | 1.09 <sup>1</sup> (1H, m)      | 31.1                |
|     | 1.47 <sup>1</sup> (1H, m)      |                     |
| 16  | 1.49 <sup>1</sup> (1H, m)      | 24.8                |
|     | 1.75 <sup>1</sup> (1H, m)      |                     |
| 17  | 1.75 <sup>1</sup> (1H, m)      | 49.8                |
| 18  | 1.00 (3H, s)                   | 15.2                |
| 19  | 0.95 (3H, s)                   | 16.0                |
| 20  |                                | 75.4                |
| 21  | 1.15 <sup>1</sup> (3H, s)      | 25.5                |
| 22  | 1.48 <sup>1</sup> (2H, m)      | 40.4                |
| 23  | 2.06 (2H, m)                   | 22.6                |
| 24  | 5.13 (1H, t, 7.2)              | 124.7               |
| 25  |                                | 131.7               |
| 26  | 1.63 (3H, s)                   | 17.7                |
| 27  | 1.69 (3H, s)                   | 25.7                |
| 28  | 0.89 (3H, s)                   | 16.3                |
| 29  | 1.04 (3H, s)                   | 21.0                |
| 30  | 1.08 (3H, s)                   | 26.7                |

<sup>1</sup> overlapped signal.

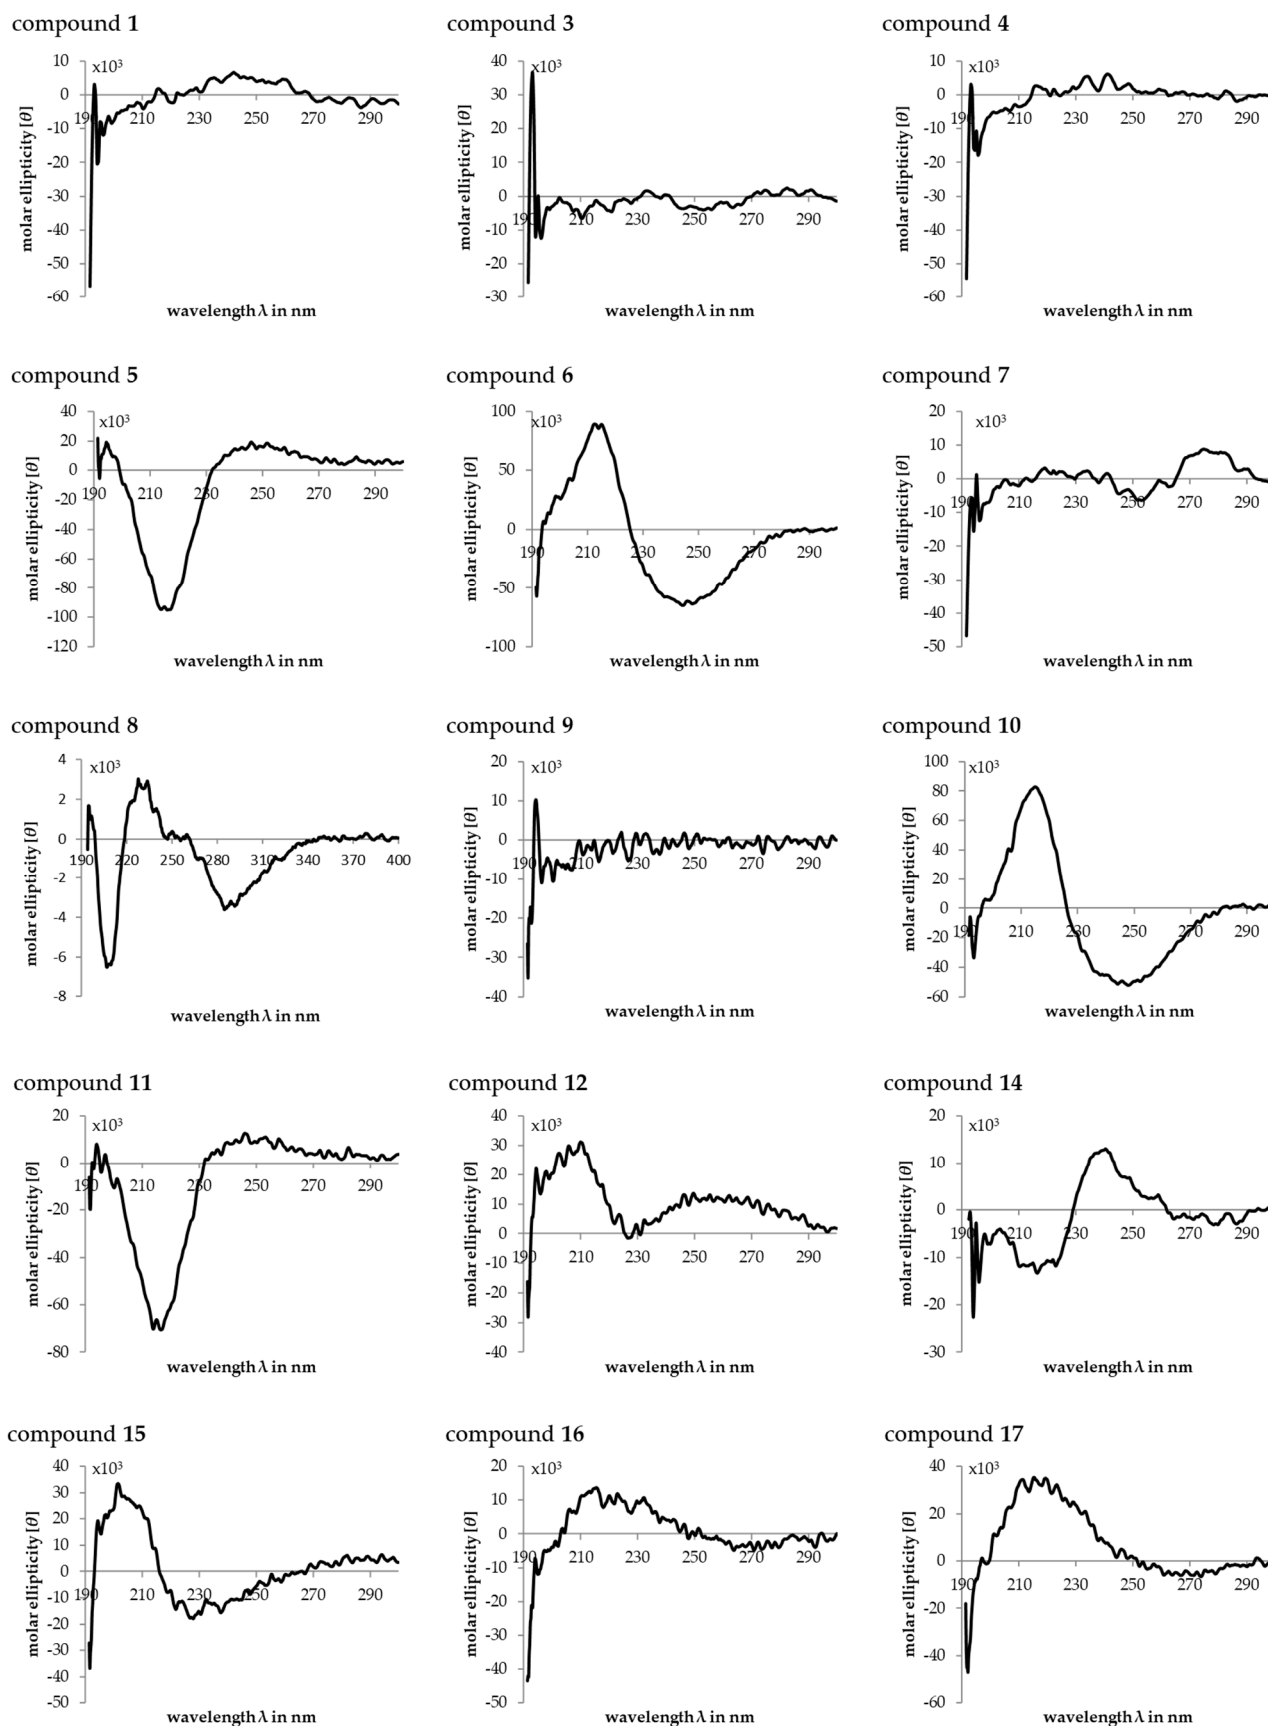

Figure S2. CD spectra of compounds 1, 3-12 and 14-17 in methanol.  $[\theta]$  in  $[(^{\circ}\text{cm}^2) \times \text{dmol}^{-1}]$ .

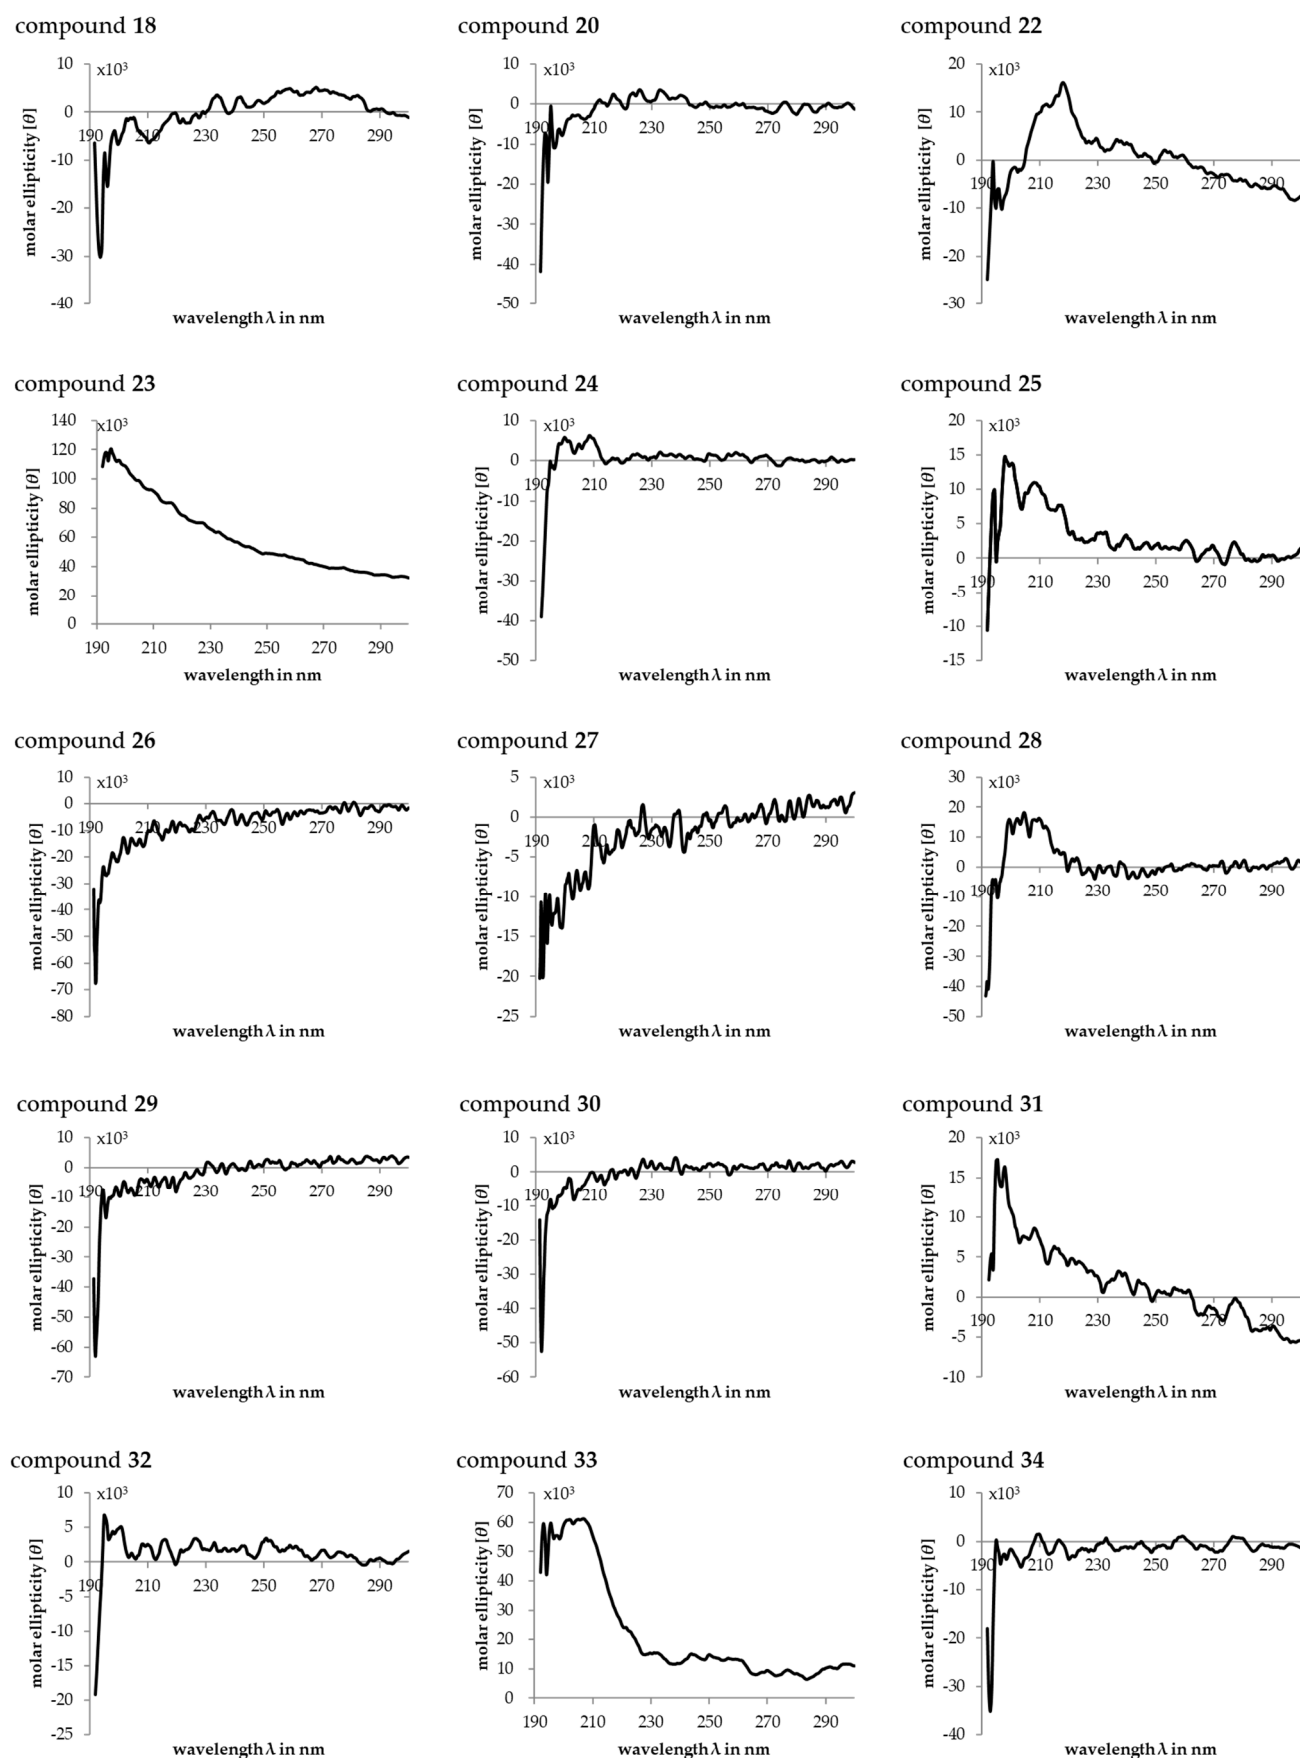

Figure S3. CD spectra of compounds 18, 20 and 22–34 in methanol.  $[\theta]$  in  $[(^\circ\text{cm}^2) \times \text{dmol}^{-1}]$ .

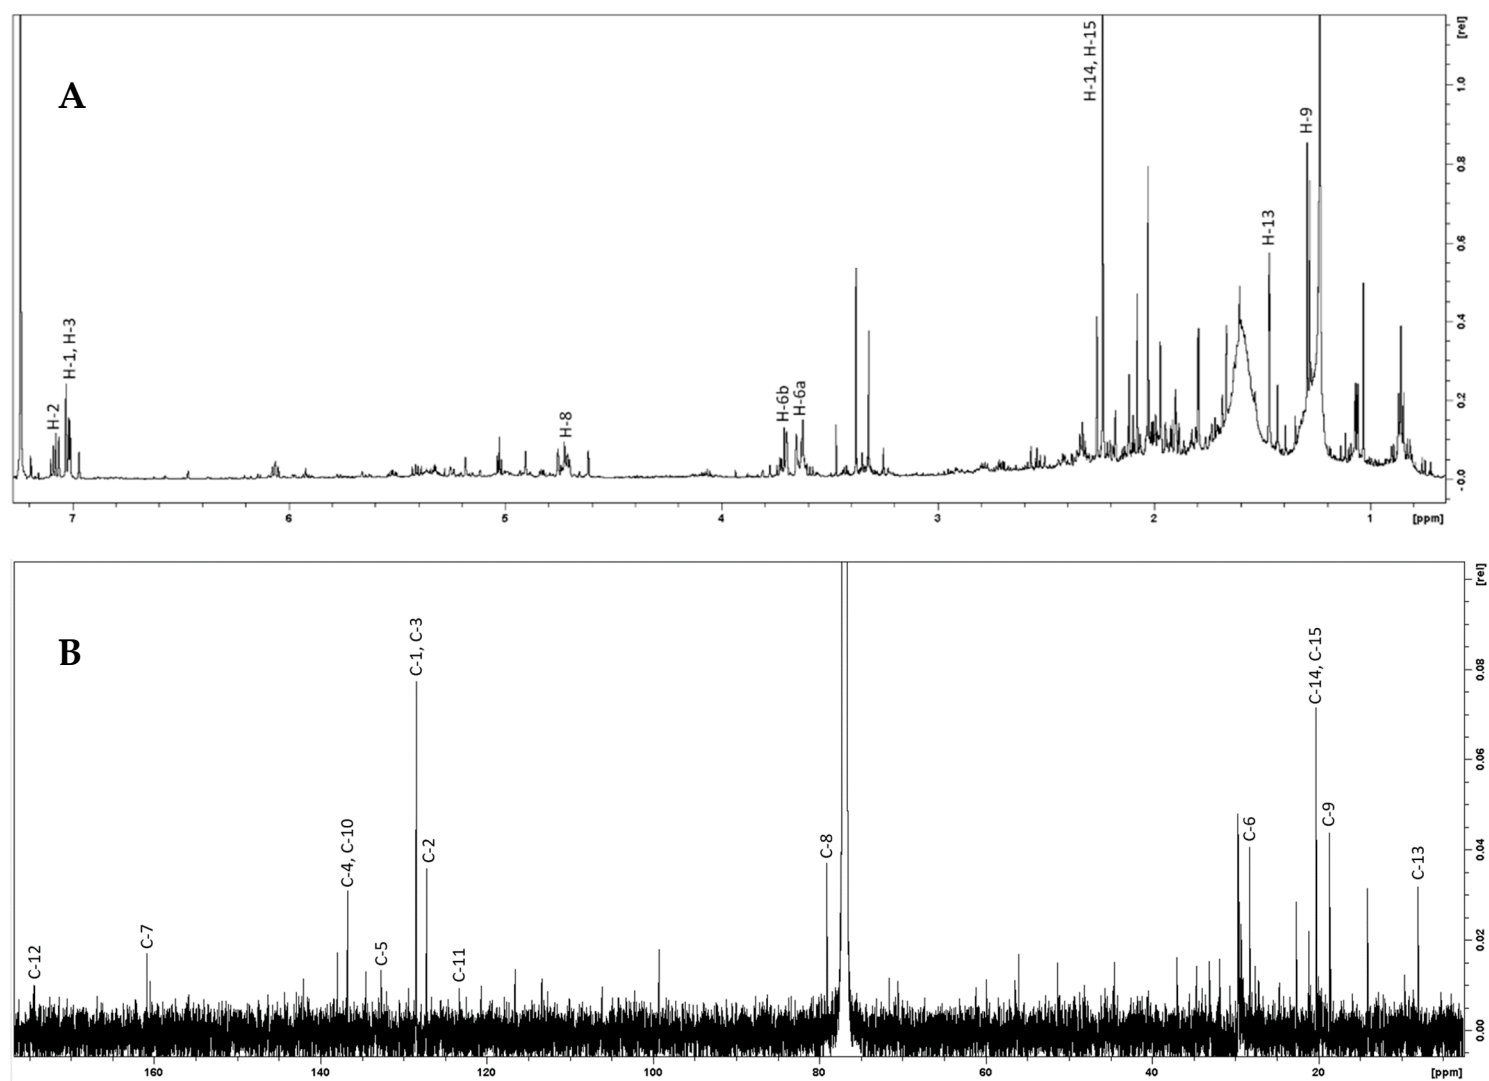

**Figure S4.** <sup>1</sup>H (600 MHz, **A**) and <sup>13</sup>C NMR spectra (150 MHz, **B**) of **1** (in CDCl<sub>3</sub>).

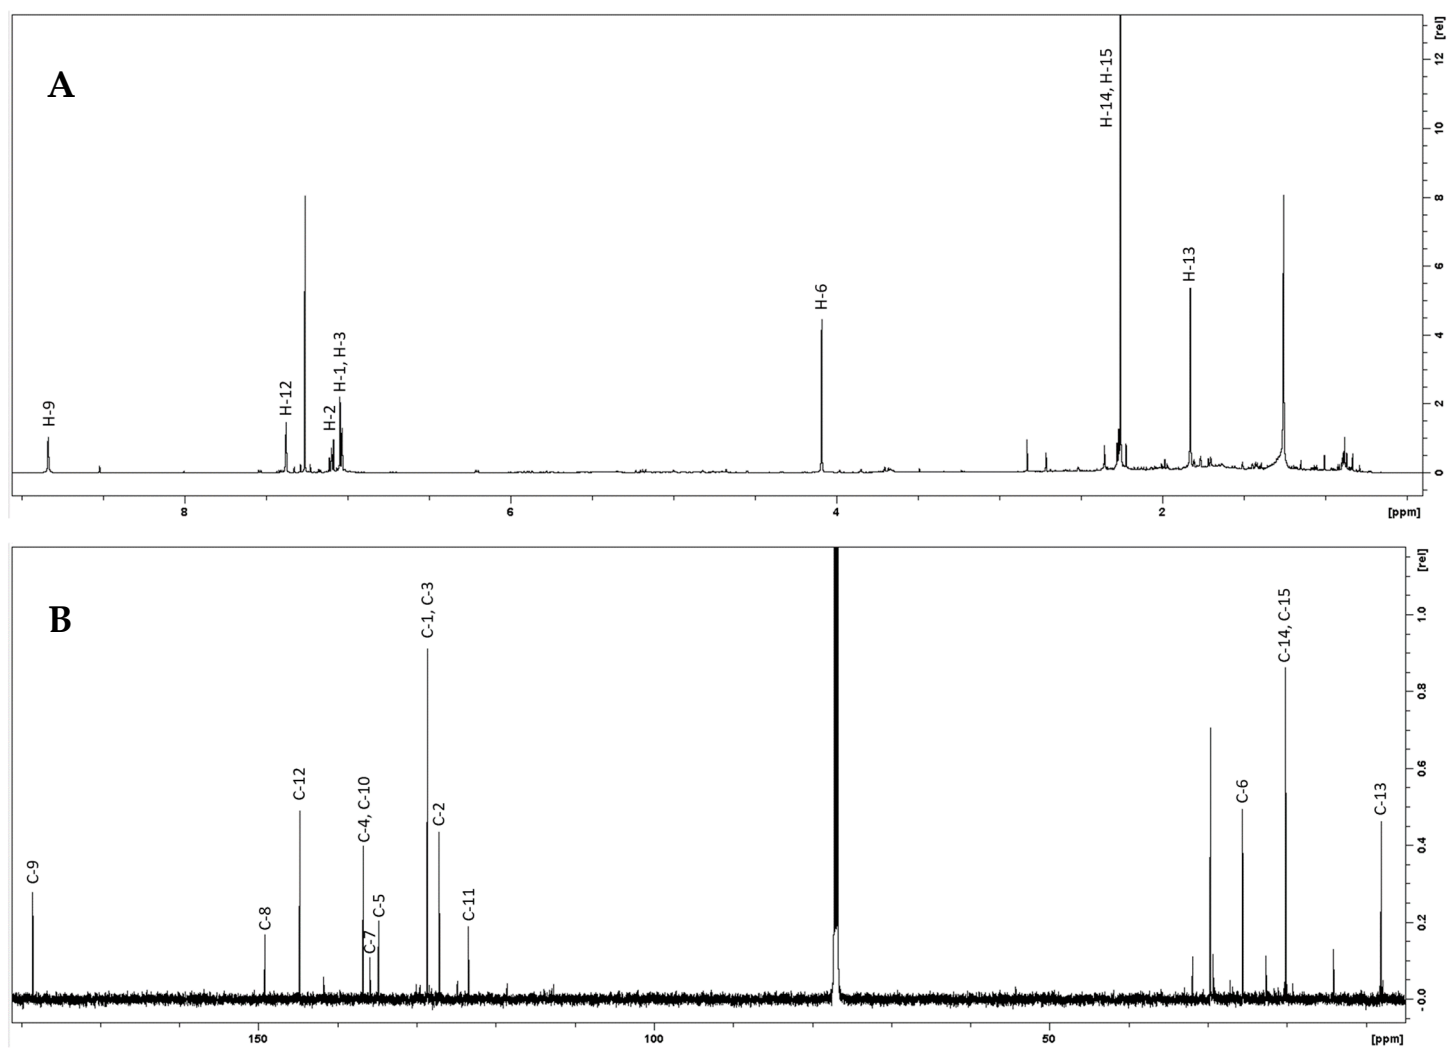

**Figure S5.** <sup>1</sup>H (600 MHz, **A**) and <sup>13</sup>C NMR spectra (150 MHz, **B**) of **2** (in CDCl<sub>3</sub>).

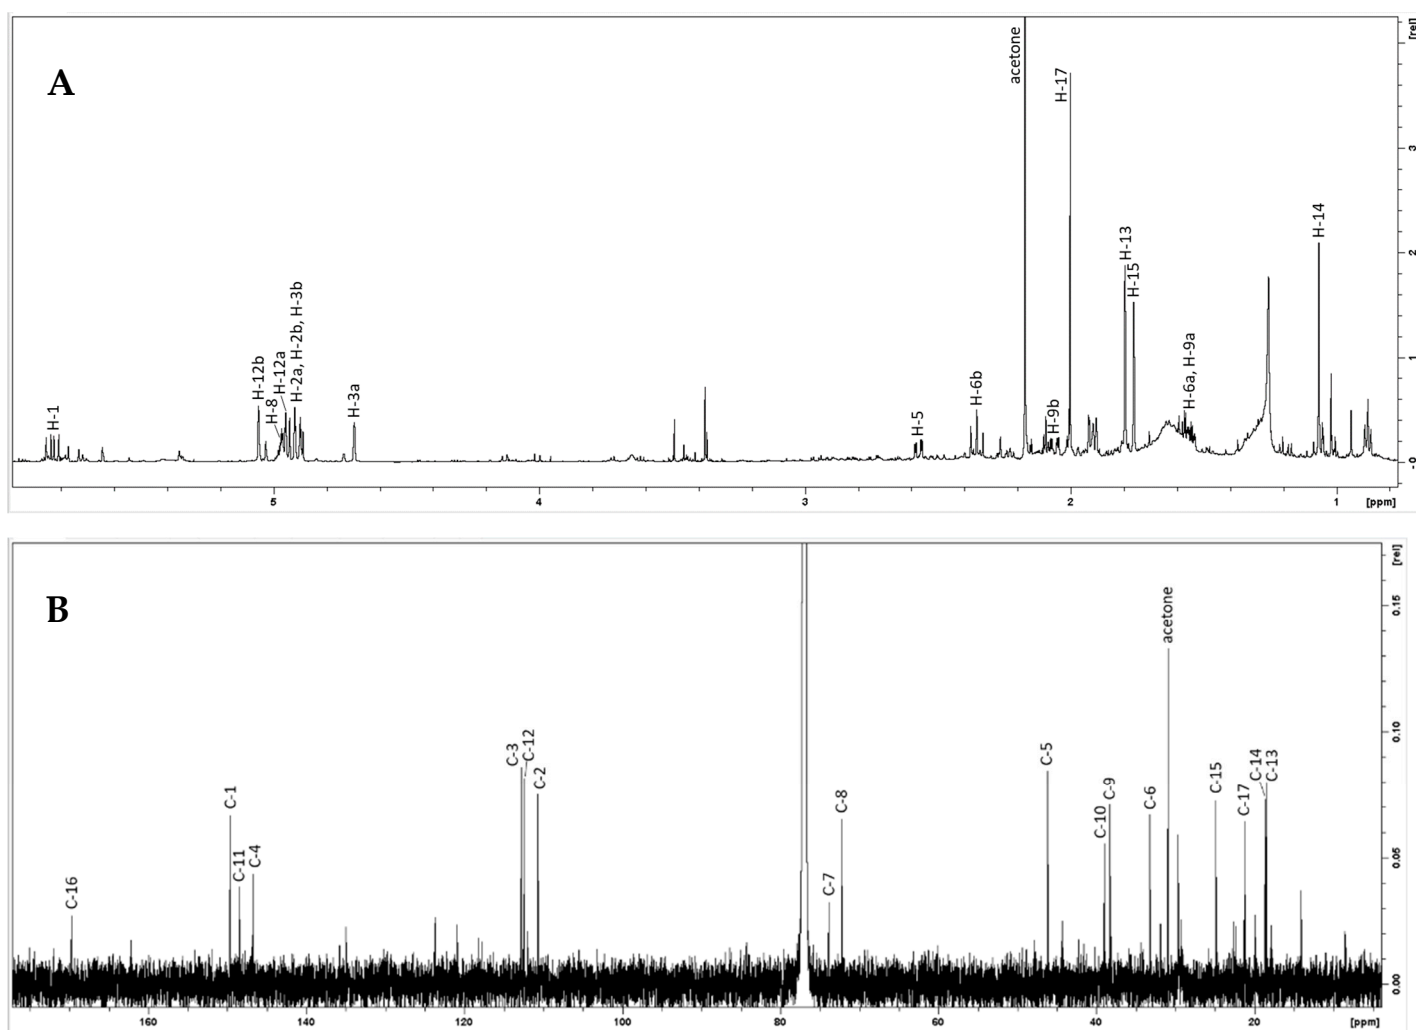

**Figure S6.** <sup>1</sup>H (600 MHz, **A**) and <sup>13</sup>C NMR spectra (150 MHz, **B**) of **3** (in CDCl<sub>3</sub>).

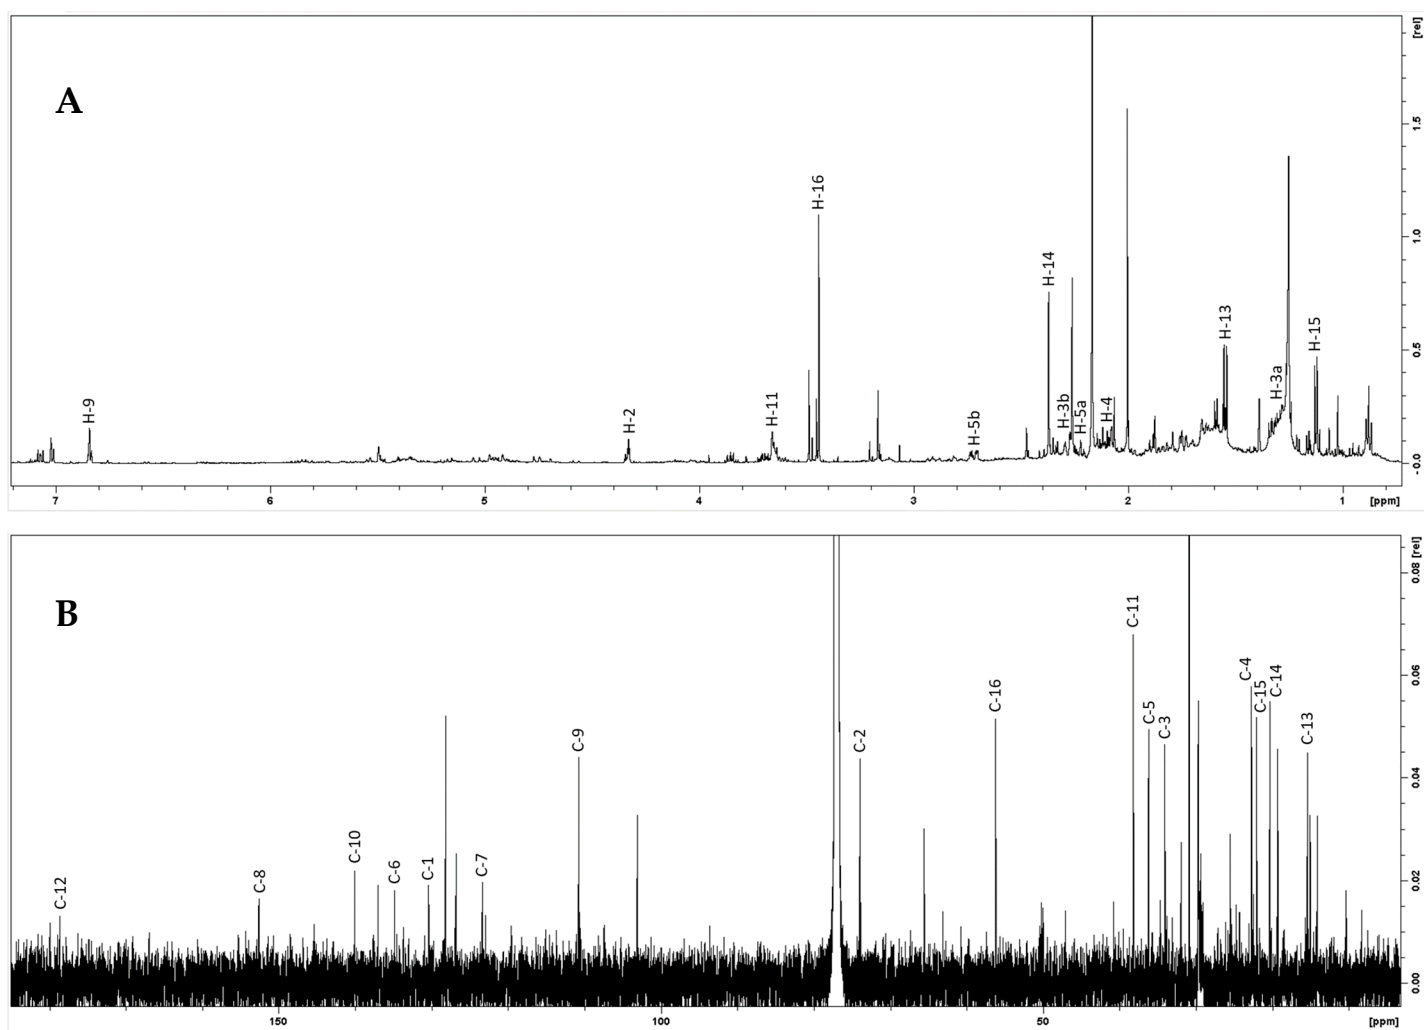

**Figure S7.** <sup>1</sup>H (600 MHz, **A**) and <sup>13</sup>C NMR spectra (150 MHz, **B**) of **4** (in CDCl<sub>3</sub>).



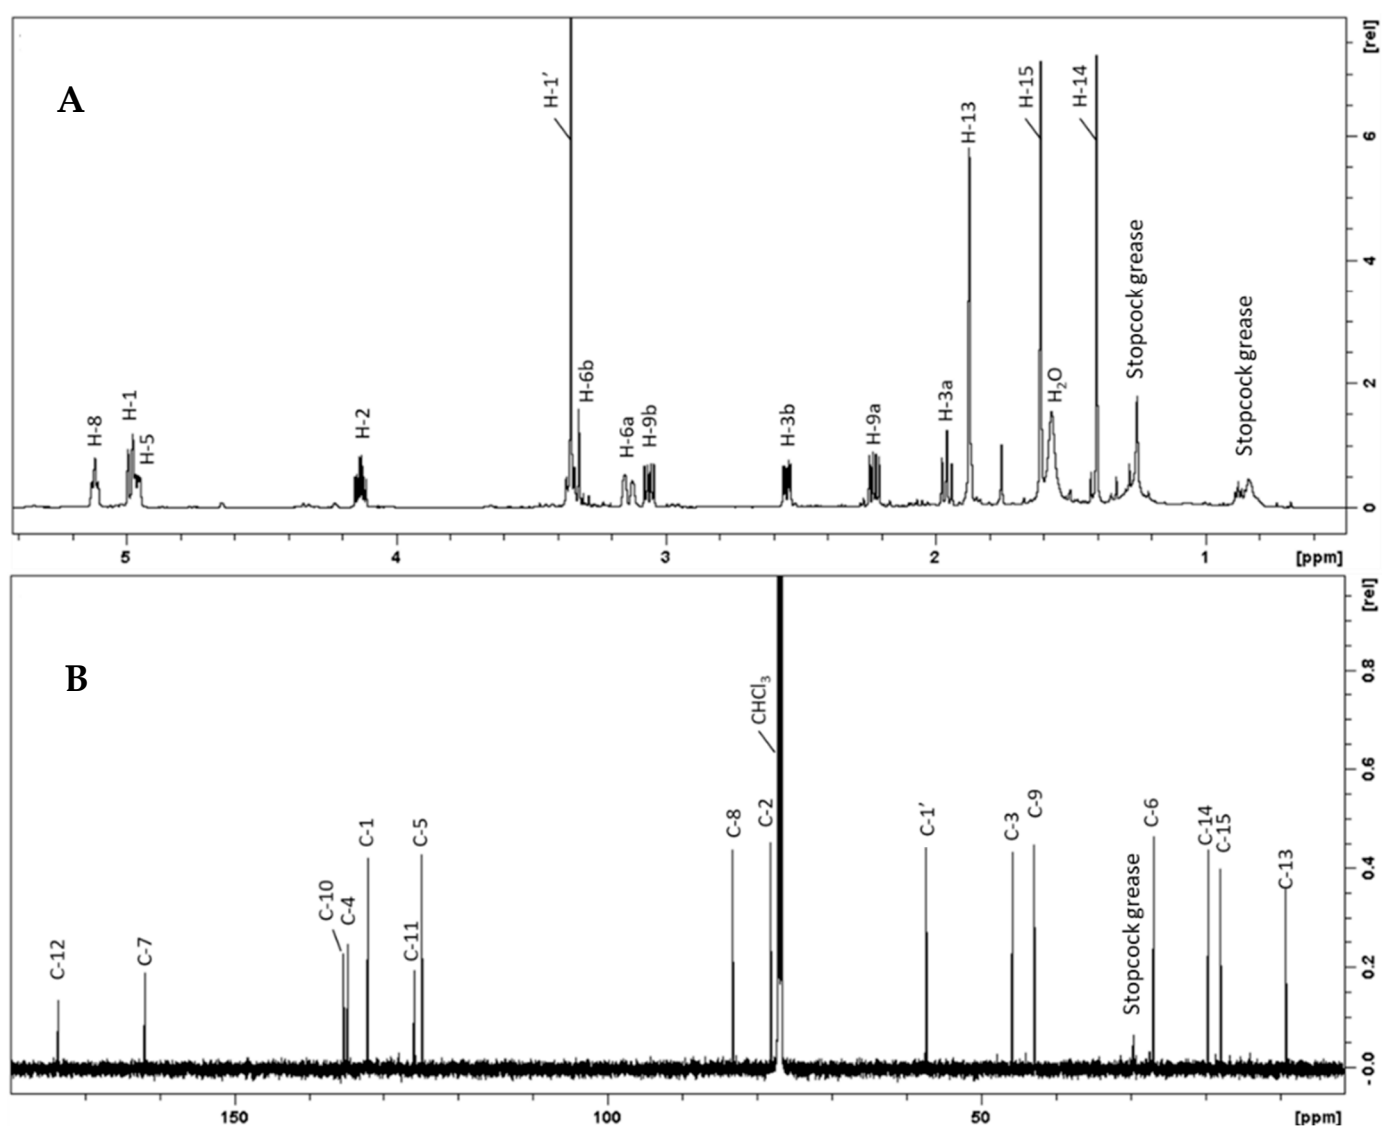

Figure S8. <sup>1</sup>H (600 MHz, A) and <sup>13</sup>C NMR spectra (150 MHz, B) of 5 (in CDCl<sub>3</sub>).

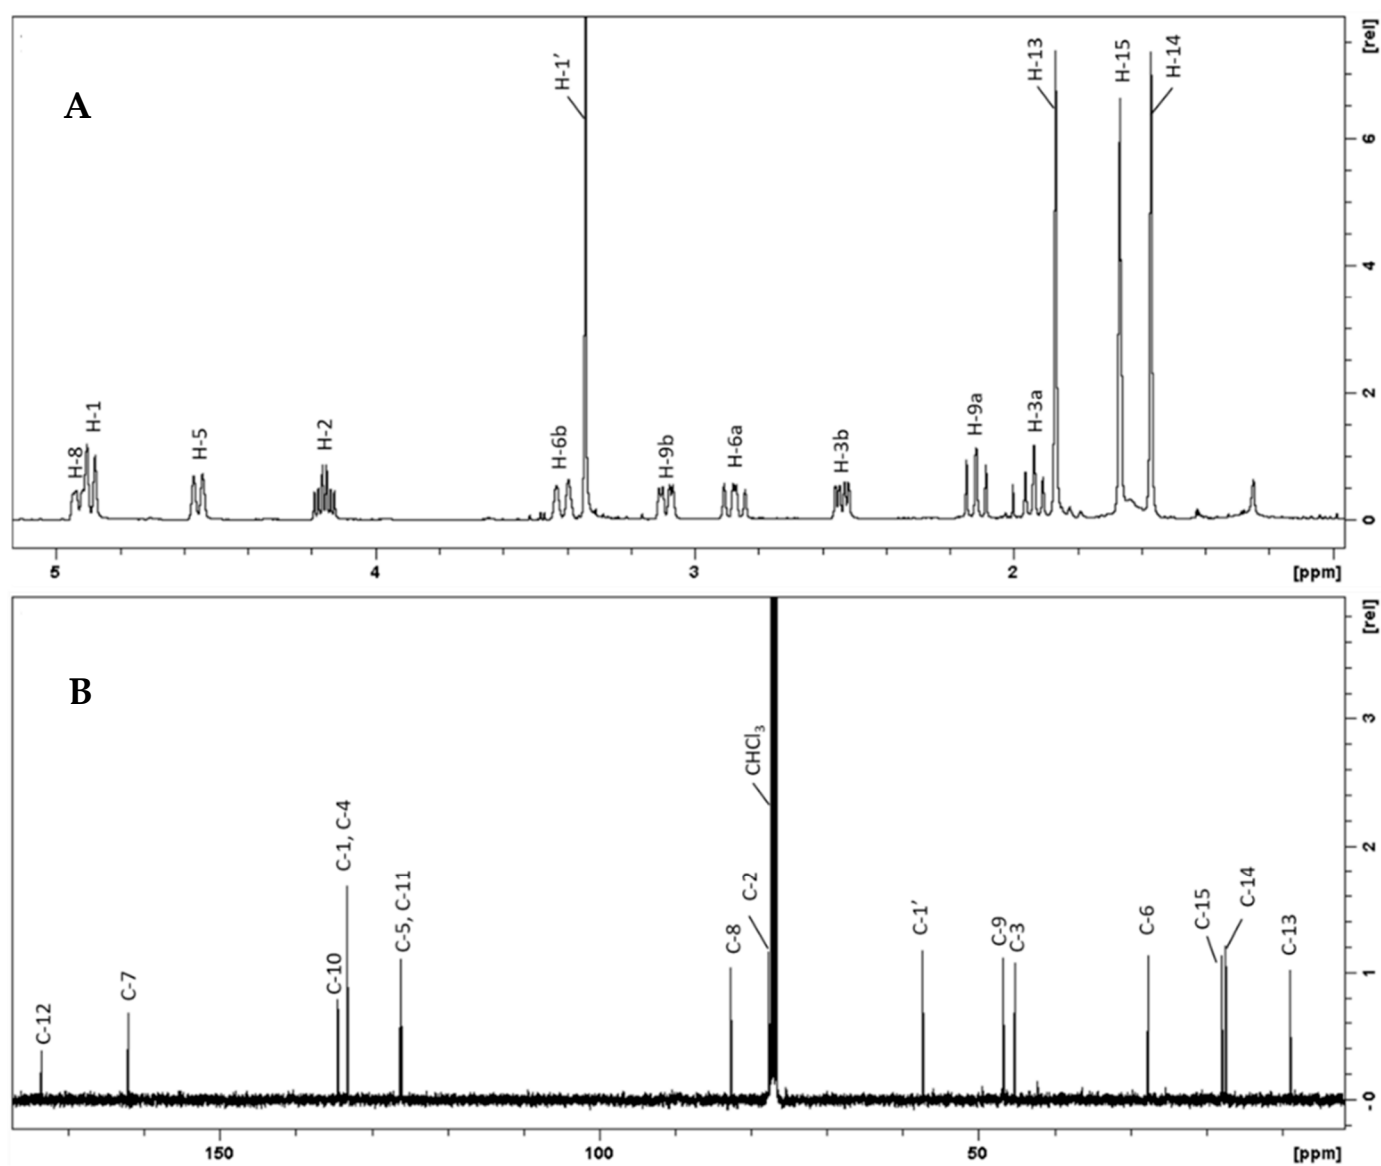

Figure S9. <sup>1</sup>H (400 MHz, A) and <sup>13</sup>C NMR spectra (100 MHz, B) of 6 (in CDCl<sub>3</sub>).

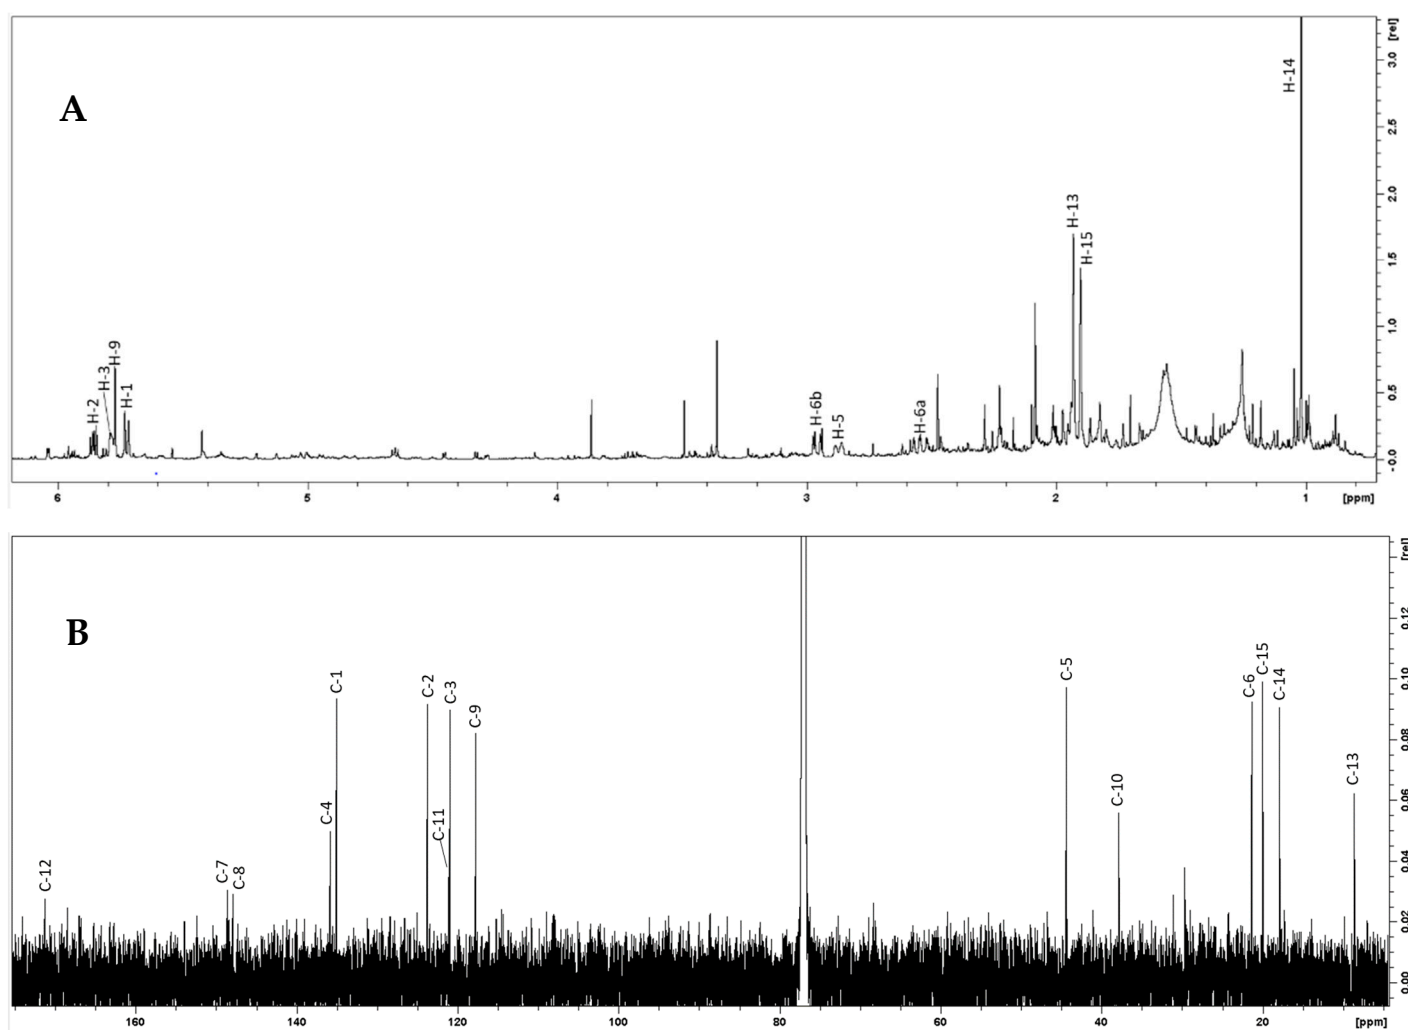

**Figure S10.** <sup>1</sup>H (600 MHz, A) and <sup>13</sup>C NMR spectra (150 MHz, B) of 7 (in CDCl<sub>3</sub>).

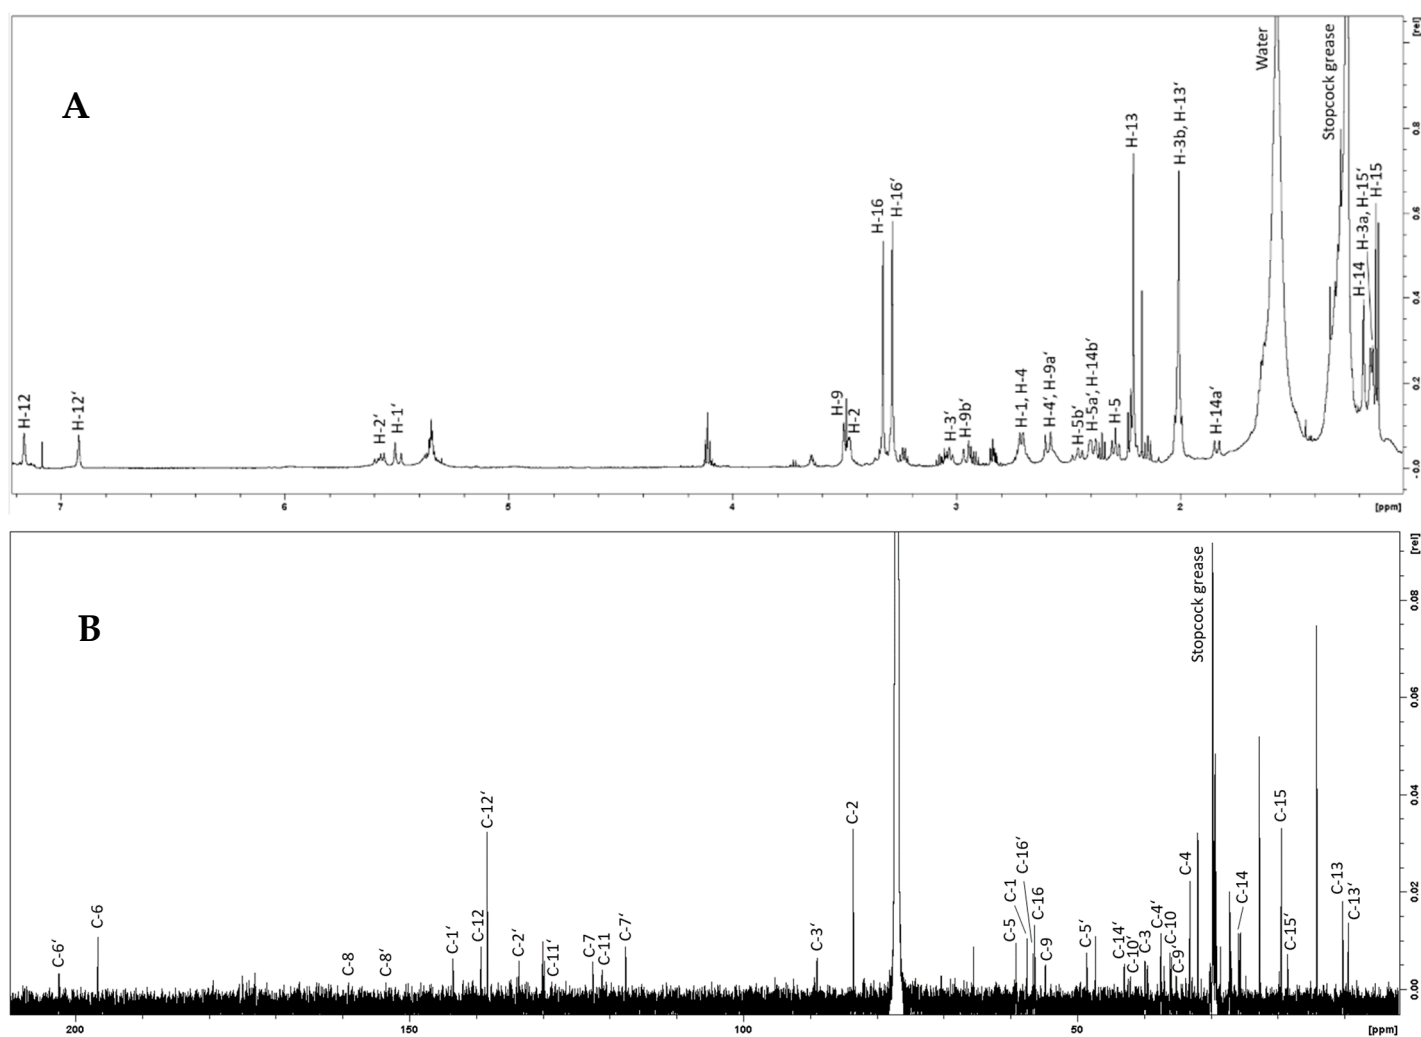

**Figure S11.** <sup>1</sup>H (600 MHz, A) and <sup>13</sup>C NMR spectra (150 MHz, B) of **8** (in CDCl<sub>3</sub>).

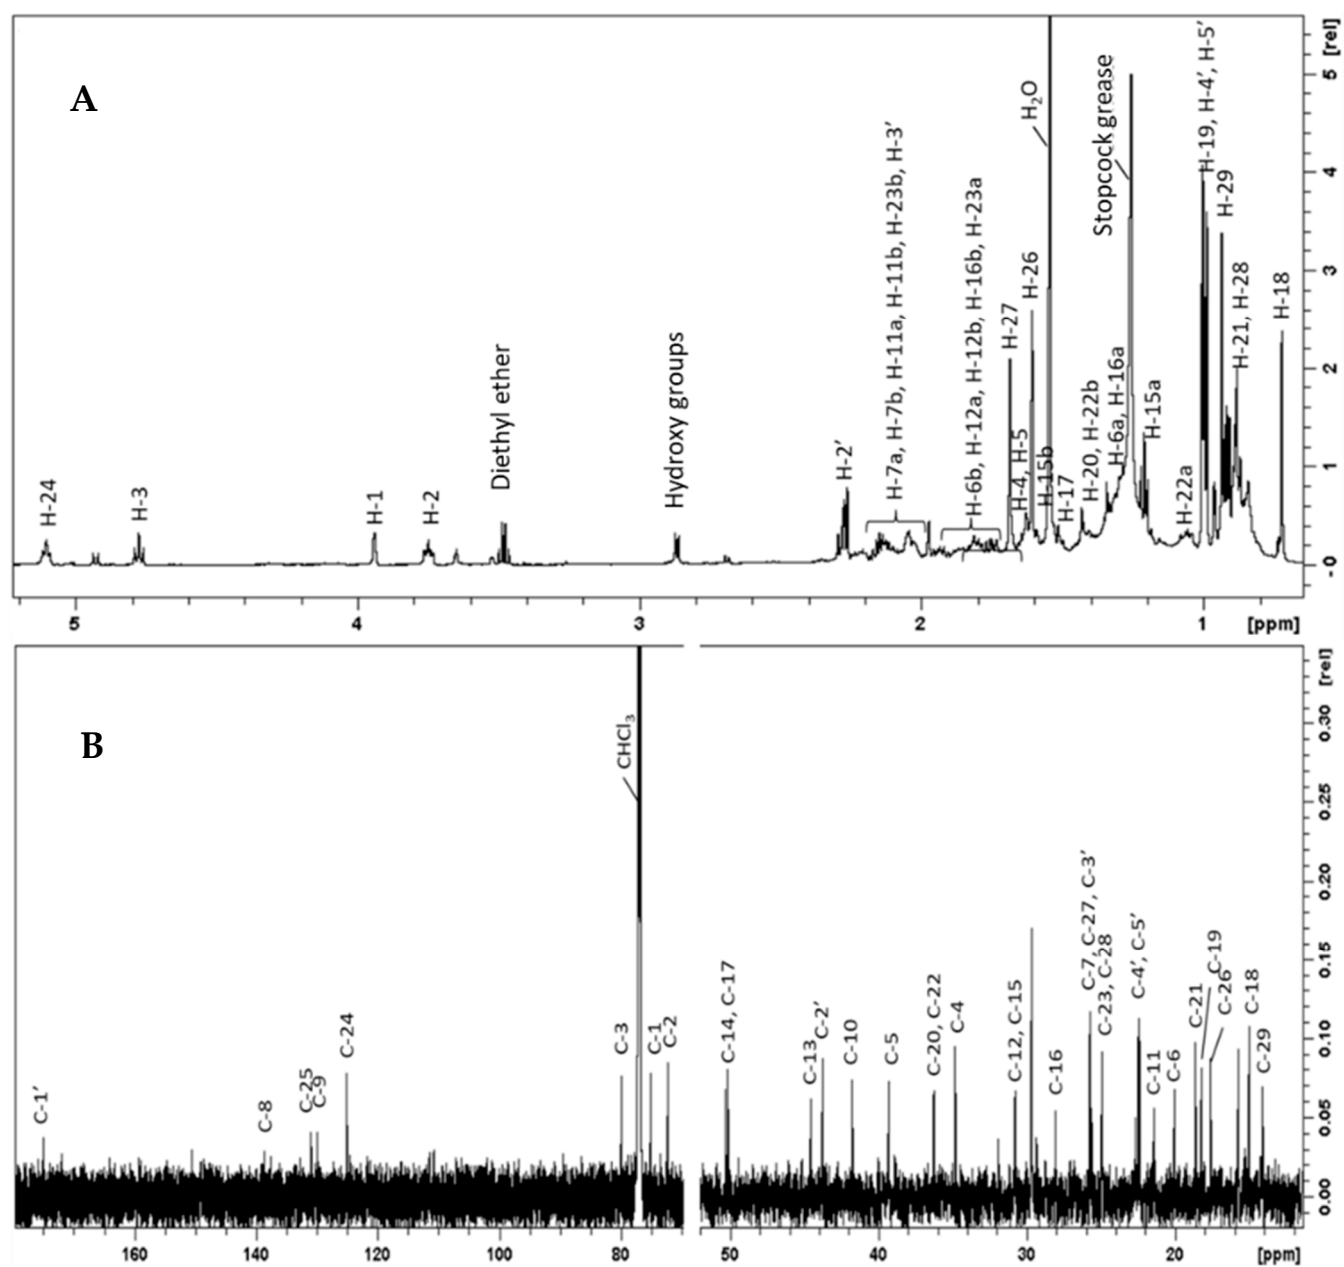

**Figure S12.** <sup>1</sup>H (600 MHz, **A**) and <sup>13</sup>C NMR spectra (150 MHz, **B**) of **23** (in CDCl<sub>3</sub>).

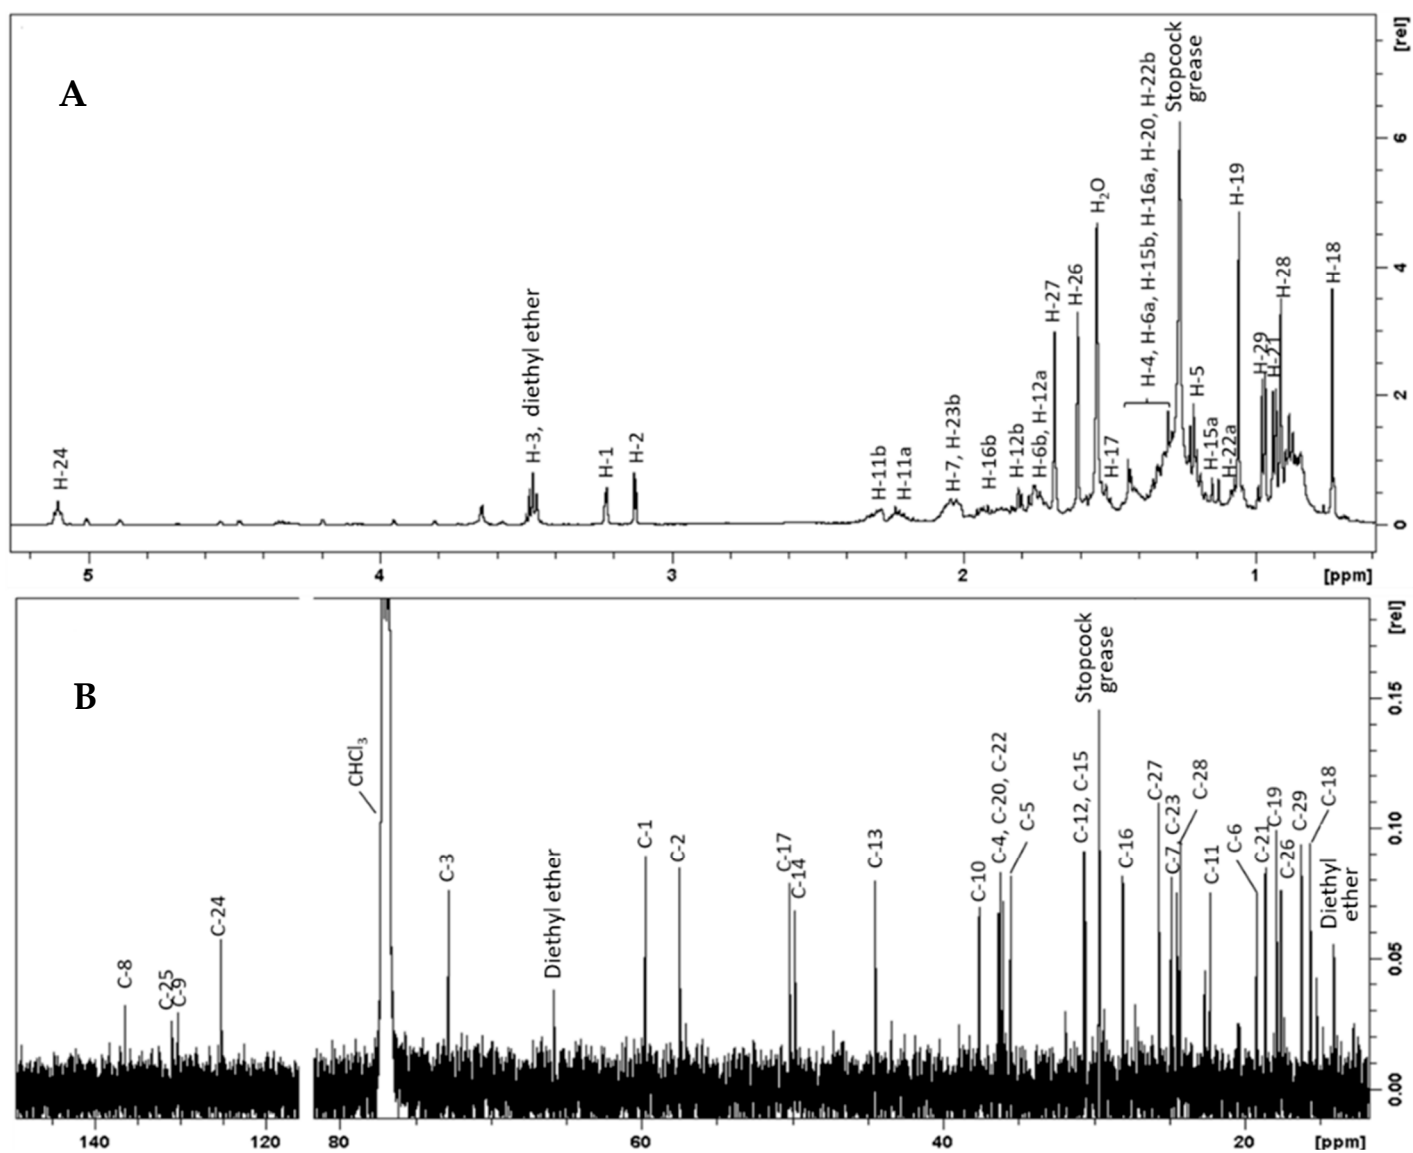

Figure S13. <sup>1</sup>H (600 MHz, A) and <sup>13</sup>C NMR spectra (150 MHz, B) of 24 (in CDCl<sub>3</sub>).

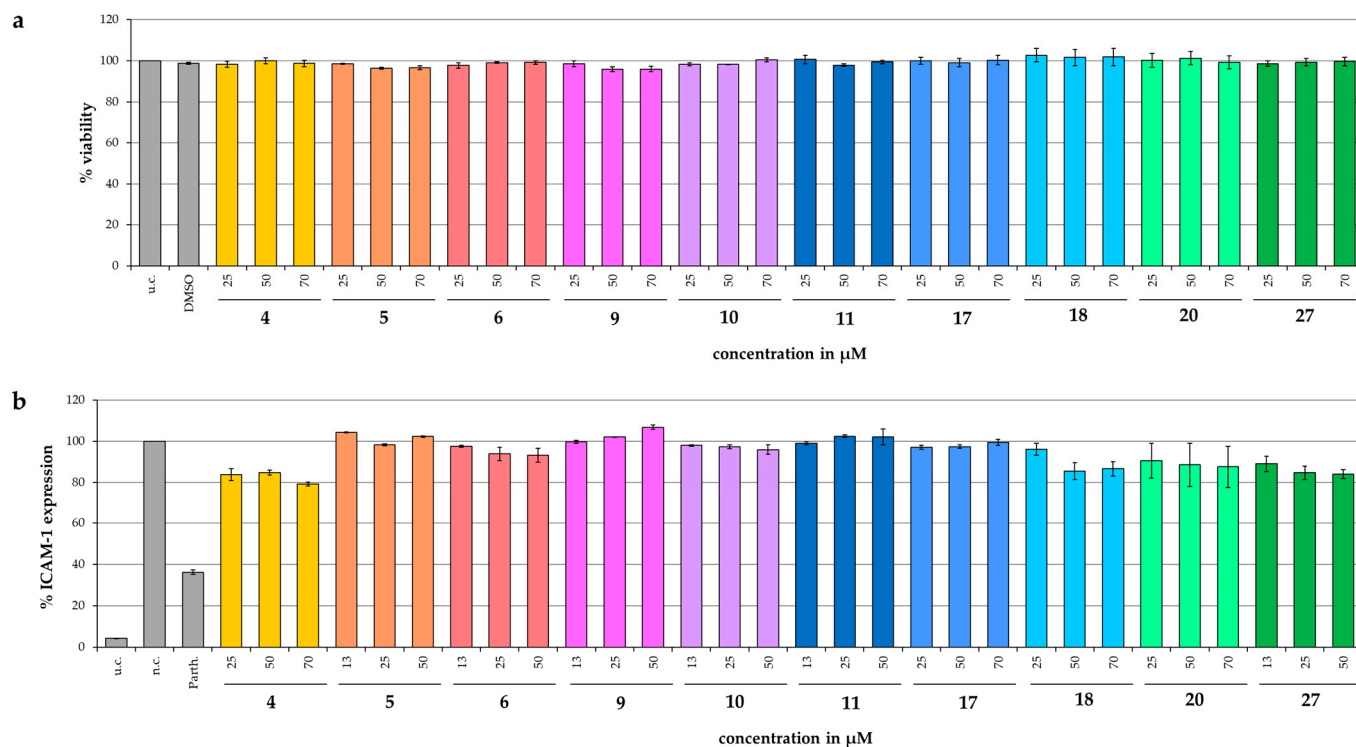

**Figure S14.** Influence of compounds **4-6**, **9-11**, **17**, **18**, **20** and **27** on the viability of HMEC-1 cells in the MTT assay (**a**) and on their TNF $\alpha$  induced ICAM-1 expression (**b**). The test was performed with medium containing DMSO (0.15%, v/v) without stimulation (u.c.), with TNF $\alpha$  (10 ng/mL, n.c.), and with both, TNF $\alpha$  and parthenolide (5  $\mu\text{M}$ , Parth.) as positive control. Substances were applied in concentrations between 13-70  $\mu\text{M}$ . Data are presented as mean  $\pm$  SEM (n=3).
